# Supplementary material
Source: PubMed Central journal article supplement (PMC3093878)

# **Mechanistic Investigation of the High Reactivity and Specificity of Peroxiredoxins with Peroxides**

## Supplemental Data

*Péter Nagy<sup>1</sup>, Amir Karton<sup>2</sup>, Andrea Betz<sup>1</sup>, Alexander V. Peskin<sup>1</sup>, Paul Pace<sup>1</sup>, Robert O'Reilly<sup>2</sup>, Mark B. Hampton<sup>1</sup>, Leo Radom<sup>2</sup>, and Christine C. Winterbourn<sup>1</sup>*

<sup>1</sup>Department of Pathology, University of Otago Christchurch, P.O. Box 4345,  
Christchurch, New Zealand.

<sup>2</sup>School of Chemistry and ARC Centre of Excellence for Free Radical Chemistry and Biotechnology, University of Sydney, Sydney, NSW 2006, Australia.

## Supporting Methods

**Reagents.** All chemicals were A.C.S. certified grade or better. Water was purified by running through a Milli-Q system (Millipore) so that its resistivity was greater than 18 M $\Omega$ cm. All reagents and enzymes were purchased from Sigma-Aldrich (St Louis) unless otherwise indicated. Prx3 was purchased from Abfrontier (Seoul, Korea). The buffer solutions were prepared from NaH<sub>2</sub>PO<sub>4</sub>·2H<sub>2</sub>O, Na<sub>2</sub>HPO<sub>4</sub> and the pH was adjusted with ~6M HCl or freshly prepared ~6M NaOH (mostly free of CO<sub>3</sub><sup>2-</sup> contamination). Unless stated otherwise, reactions were carried out at 20 °C with diethylenetriamine-pentaacetic acid (DTPA; 50  $\mu$ M) present to chelate contaminating trace metal ions. The concentrations of stock solutions of H<sub>2</sub>O<sub>2</sub> were determined iodometrically. The concentration of H<sub>2</sub>O<sub>2</sub> in solutions prepared from the stock solution were confirmed spectrophotometrically ( $\epsilon(\text{H}_2\text{O}_2)^{240\text{nm}} = 43.6 \text{ M}^{-1} \text{ cm}^{-1}$ ).

### **Preparation of recombinant Prxs and site-directed mutagenesis of Arg residues.**

*Cloning, expression and purification of bacterially expressed human Peroxiredoxin 3.* Human Prx3 cDNA (Origene) was amplified using primers to encode a TEV protease cleavage site immediately before amino acid 62 [forward primer: 5'-GCG GAA TTC GAA AAC CTG TAT TTT CAG TCG GCA CCT GCT GTC ACC CAG CAT GC-3'; reverse primer: 5'-GCG CTC GAG TCA CTG ATT TAC CTT CTG AAA GTA C-3'], and sub-cloned EcoRI-XhoI into pET28a vector (Novagen) in frame to express an amino terminal 6 x Histidine tagged Prx2 recombinant protein. Note that aa 1 of all recombinant Prx3 protein constructs used in this study corresponds to aa 62 of the hPrx 3 preprotein. This plasmid was then used as a template for site-directed mutagenesis using the GeneTailor Site-Directed Mutagenesis System (Life Technologies) to generate mutants Prx3-R123G, Prx3-R146G, Prx3-R146A, Prx3-R146H, Prx3-R146K and the double mutant Prx3-R123G-R146G using relevant altered codon primer pairs (following the manufacturer's instructions). Wild type and mutant sequences were verified by DNA sequencing and transformed into BL21(DE3)pLysS *E.coli* for protein expression.

His-Prx3 and mutants were purified in an identical manner. Briefly BL21(DE3)pLysS carrying His-Prx3 plasmids were cultured to early log phase, induced with 0.75mM IPTG, cultured for a further 4 hours at 25 °C, then harvested into lysis buffer (50 mM Na-phosphate pH8 / 200 mM NaCl / 10 mM imidazole / 0.2 mM PMSF) and sonicated. Clarified extracts were applied to His Select Cobalt Affinity Gel (Sigma) and His-Prx3 proteins were purified according to manufacturer's instructions (Sigma). Histidine tags were cleaved off using TEV protease expressed and purified from pRK793 [1] and removed with His Select Cobalt Affinity Gel (Sigma). Recombinant Prx3 proteins were stored at -80 °C.

### *Cloning, expression and purification of bacterially expressed human Peroxiredoxin 2.*

Human Prx2 cDNA was amplified using primers to encode a Factor Xa cleavage site immediately before the amino terminal methionine [forward primer: 5'-GCGGAATTCATCGAAGGTCGTATGGCCTCCGGTAACGCGGCATCGGA3'; reverse primer: 5'-CGCTCGAGCTAATTGTGTTTGGAGAAATATTC3'], cloned into TOPOblunt vector (Invitrogen; according to manufacturer's instructions), and further sub-cloned EcoRI-XhoI into pET28a vector (Novagen) in frame to express an amino

terminal 6 x Histidine tagged Prx2 recombinant protein. This plasmid was then used as a template for site-directed mutagenesis using Pfu polymerase (according to manufacturer's instructions) to generate mutants Prx2-R127K, Prx2-R150K and the double mutant Prx2-R127K-R150K, using relevant altered codon primer pairs. The double mutant Prx2-R127K-R150K was created using R127K mutagenesis primers on the Prx2-R150K template. Wild type and mutant sequences were verified by DNA sequencing and transformed into BL21(DE3)pLysS E.coli for protein expression.

His-Prx2 and mutants were purified in an identical manner. Briefly BL21(DE3)pLysS carrying His-Prx2 plasmids were cultured to early log phase, induced with 1 mM IPTG, cultured for a further 4 hours at 37 °C, then harvested into lysis buffer (20 mM Tris.Cl pH7.4 / 500 mM NaCl / 10 % glycerol / 0.1 mg/ml lysosyme / 1 mM PMSF) and sonicated. Clarified extracts were applied to His Select Cobalt Affinity Gel (Sigma) and His-Prx2 proteins were purified according to manufacturer's instructions (Sigma). Histidine tags were cleaved off using Factor Xa protease (Roche, according to manufacturer's instructions), and removed with His Select Cobalt Affinity Gel (Sigma). Full-length recombinant Prx2 proteins were stored at -80 °C.

Full length Prx2 and Prx3 proteins were analysed by coomassie stained SDS-PAGE, circular dichroism (CD) and mass spectrometry (see Figures S1 and S3).

### **Biophysical characterization of the recombinant WT and Arg mutants of Prx.**

*CD spectroscopy.* WT and mutant proteins were treated with 2 molar equivalents of H<sub>2</sub>O<sub>2</sub> to produce the dimeric forms. Protein solutions were desalted by passing through a Micro Bio-Spin 6 Chromatography column (Bio-Rad, Hercules, CA, USA) and the CD spectra were recorded. The spectra were collected using a 0.1-cm path length cuvette containing 0.1 mg/mL protein in 20 mM sodium phosphate buffer (pH 7.4). The assays were carried out at 20 °C in a Jasco J-720 spectropolarimeter (Jasco, Easton, MD). Spectra are presented as an average of three scans recorded from 195 to 260 nm.

*Thermal stability measurements.* The melting temperature of wild-type and mutant Prx 2 and Prx3 was determined by differential scanning fluorimetry (DSF) [2]. Protein samples in 20 mM Na-phosphate buffer pH 7.4 (0.1 mg/mL, 64 µL) were mixed with SYPRO orange fluorescent dye (Invitrogen) (16 µL, diluted 100-fold from supplied concentration with dH<sub>2</sub>O) in a 96-well microplate (total volume 25 µL). After sealing the plate, a stepped thermal melt program scanning from 20 °C to 100 °C in increments of 1 °C, with a dwell time of 10 s after each temperature rise, was run on a Bio-Rad iQ5 Multicolor Real-Time PCR Detection System. Excitation and emission wavelengths were 490 and 575 nm, respectively. Melting temperatures (T<sub>m</sub>) were determined as the point of inflection (dRFU/dt). Measurements were carried out in triplicate for each condition.

**Computational Details.** Unless otherwise indicated, all the calculations were carried out using Gaussian 09 Revision A.02 [3]. Geometry optimizations were performed using the B3-LYP [4-6] density functional theory procedure in conjunction with the 6-31+G(2df,p) basis set, and were carried out in the gas phase. All geometry optimizations and single-point energy calculations were performed using the "ultrafine" pruned (99,590) grid, as recommended by Martin et al. [7]. Equilibrium structures were verified to have all real

harmonic frequencies, and transition structures were confirmed to have one imaginary frequency. The connectivities of the transition structures were confirmed by performing intrinsic reaction coordinate (IRC) calculations [8–10]. Bulk solvent effects were approximated by single-point energy calculations using the conductor-like polarizable continuum model (CPCM) [11] as implemented in Gaussian 03 Revision E.01 [12] at the HF/6-31+G(d) level of theory in conjunction with UAHF atomic radii, as recommended by Takano and Houk [13]. Two dielectric constants were used:  $\epsilon = 78.4$  for water, and the standard value of  $\epsilon = 4.0$  for modeling the protein-like environment of the active site [14, 15].

Reaction enthalpies and Gibbs free energies in the gas phase were calculated at the G4 level at 298 K [16]. G4 theory aims at reproducing the basis-set-limit CCSD(T) (coupled cluster theory with singles, doubles, and quasiperturbative triple excitations) energy and includes zero-point energy, first-order spin-orbit, and temperature corrections. It is capable of calculating thermochemical properties (such as reaction energies, bond dissociation energies, and enthalpies of formation) with mean absolute deviations from experimental energies of  $3.0 \text{ kJ mol}^{-1}$ . As all of the reactions considered in the present work are isogyric and do not involve atomic species, the G4 protocol becomes nonempirical.

The combination of a CPCM solvation correction on top of a gas-phase G4//B3-LYP/6-31+G(2df,p) energy is denoted CPCM-G4//B3-LYP/6-31+G(2df,p).

**Computational Results.** Table S2 displays the enthalpies ( $\Delta H_{298}$ ) and Gibbs free energies ( $\Delta G_{298}$ ) in the gas-phase (calculated at the G4//B3-LYP/6-31+G(2df,p) level) and in the protein-like environment (calculated at the CPCM-G4//B3-LYP/6-31+G(2df,p) level) associated with the reactions in Figure 4 of the main text and Figure S2.

Table S3 presents the absolute gas-phase G4//B3-LYP/6-31+G(2df,p) vibrationless energies ( $E_e$ ), absolute energies at 0 K ( $E_0$ ), enthalpies at 298 K ( $H_{298}$ ), and Gibbs free energies at 298 K ( $G_{298}$ ). Table S3 also lists the CPCM-G4//B3-LYP/6-31+G(2df,p) enthalpies at 298 K, and the Gibbs free energies at 298 K, both in the aqueous phase ( $H_{298}(\text{aq})$ ,  $G_{298}(\text{aq})$ ,  $\epsilon = 78.4$ ) and in the protein-like phase ( $H_{298}(\text{enz})$ ,  $G_{298}(\text{enz})$ ,  $\epsilon = 4.0$ ).

Table S4 gives selected bond distances and bond angles for the species associated with the reactions in Figure 4 of the main text and Figure S2. We note that in nearly all the catalyzed transition structures, the partial  $\text{S}\cdots\text{O}_a$  bond is longer by  $0.068\text{--}0.224 \text{ \AA}$ , the partial  $\text{O}_a\cdots\text{O}_b$  bond is shorter by  $0.008\text{--}0.160 \text{ \AA}$ , and the  $\angle\text{SO}_a\text{O}_b$  angle is reduced by  $0.4\text{--}14.0^\circ$  relative to values in the uncatalyzed transition structure.

Table S5 presents structures optimized at the B3-LYP/6-31+G(2df,p) level of theory (in Cartesian coordinates,  $\text{\AA}$ ).

The reaction profiles computed in the protein-like environment are all qualitatively similar, and a typical example ([Gua+ $\cdots$ S, O<sub>a</sub>, O<sub>b</sub>], see Figure 4 of the main text) is displayed schematically in Figure S4. It shows the reactants, reactant complex (RC), transition structure (TS), product complex (PC), and products at the various stages of the reaction.

In the main text, we noted that the hydrogen-bond interactions in the catalyzed model systems stabilize the transition structures more than they stabilize the reactant complexes. The estimated stabilization energies are reported here. Regarding the

reactions depicted in Figure S2, the hydrogen bonds at the various chalcogen centers are estimated to stabilize the  $S_N2$  transition structures by 43.1 ( $O_a$ ), 44.2 ( $O_b$ ), 65.2 ( $O_a + O_b$ ), 77.5 ( $S + O_b$ ), and 89.9 ( $S + O_a + O_b$ )  $\text{kJ mol}^{-1}$ , respectively.<sup>1</sup> The stabilizing effects in the corresponding reactant complexes are found to be 29.3 ( $O_a$ ), 29.2 ( $O_b$ ), 46.6 ( $O_a + O_b$ ), 54.6 ( $S + O_b$ ), and 68.9 ( $S + O_a + O_b$ )  $\text{kJ mol}^{-1}$ , respectively. Regarding the  $[\text{Gua}^+\cdots\text{S},\text{O}_a,\text{O}_b]$  and  $[\text{Gua}^+\cdots\text{S},\text{O}_a]$  reactions in Figure S2, the interaction energies between the guanidinium cation and the  $[\text{SH}\cdots\text{O}_b\text{H}\cdots\text{O}_a\text{H}]$  moiety are estimated to be 131.4 ( $[\text{Gua}^+\cdots\text{S},\text{O}_a,\text{O}_b]\text{-TS}$ ) and 128.0  $\text{kJ mol}^{-1}$  ( $[\text{Gua}^+\cdots\text{S},\text{O}_a]\text{-TS}$ ) in the transition structures, and 104.1 ( $[\text{Gua}^+\cdots\text{S},\text{O}_a,\text{O}_b]\text{-RC}$ ) and 105.6  $\text{kJ mol}^{-1}$  ( $[\text{Gua}^+\cdots\text{S},\text{O}_a]\text{-RC}$ ) in the reactant complexes. Thus, it is evident that in all cases the hydrogen bonds stabilize the transition structures more than they stabilize the reactant complexes.

### Supplemental References:

[1] Kapust RB, Tözsér J, Fox JD, Anderson DE, Cherry S, Copeland TD, Waugh DS (2001) Tobacco etch virus protease: mechanism of autolysis and rational design of stable mutants with wild-type catalytic proficiency. *Prot. Eng.* 14 (12): 993–1000.

[2] Ericsson UB, Hallberg BM, Detitta GT, Dekker N, Nordlund P (2006) Thermofluor-based high-throughput stability optimization of proteins for structural studies. *Anal. Biochem.* 357(2):289–98.

[3] Gaussian 09, Revision A.02 (2009) Frisch MJ, Trucks GW, Schlegel HB, Scuseria GE, Robb MA, Cheeseman JR, Scalmani G, Barone V, Mennucci B, Petersson GA, Nakatsuji H, Caricato M, Li X, Hratchian HP, Izmaylov AF, Bloino J, Zheng G, Sonnenberg JL, Hada M, Ehara M, Toyota K, Fukuda R, Hasegawa J, Ishida M, Nakajima T, Honda Y, Kitao O, Nakai H, Vreven T, Montgomery Jr JA, Peralta JE, Ogliaro F, Bearpark M, Heyd JJ, Brothers E, Kudin KN, Staroverov VN, Kobayashi R, Normand J, Raghavachari K, Rendell A, Burant JC, Iyengar SS, Tomasi J, Cossi M, Rega N, Millam NJ, Klene M, Knox JE, Cross JB, Bakken V, Adamo C, Jaramillo J, Gomperts R, Stratmann RE, Yazyev O, Austin AJ, Cammi R, Pomelli C, Ochterski JW, Martin RL, Morokuma K, Zakrzewski VG, Voth GA, Salvador P, Dannenberg JJ, Dapprich S, Daniels AD, Farkas Ö, Foresman JB, Ortiz JV, Cioslowski J and Fox DJ, Gaussian, Inc, Wallingford CT.

[4] Lee C, Yang W, Parr RG (1988) Development of the Colle–Salvetti correlation–energy formula into a functional of the electron density. *Phys. Rev. B* 37(2):785–789.

[5] Becke AD (1993) Density–functional thermochemistry. III. The role of exact exchange. *J. Chem. Phys.* 98(7):5648–5652.

---

<sup>1</sup>Obtained by taking the difference in enthalpies between the transition structures for the catalyzed reactions and the sum of the enthalpies for the uncatalyzed transition structure and the appropriate number of HF molecules.

- [6] Stephens PJ, Devlin FJ, Chabalowski CF, Frisch MJ (1994) Ab initio calculation of vibrational absorption and circular dichroism Spectra Using Density Functional Force Fields. *J. Phys. Chem.* 98(45):11623–11627.
- [7] Martin JML, Bauschlicher CW Jr, Ricca A (2001) On the integration accuracy in molecular density functional theory calculations using Gaussian basis sets. *Comput. Phys. Commun.* 133:189–201.
- [8] Fukui K (1981) The path of chemical reactions – the IRC approach. *Acc. Chem. Res.* 14(12):363–368.
- [9] Gonzalez C, Schlegel HB (1989) An improved algorithm for reaction path following. *J. Chem. Phys.* 90:2154–2161.
- [10] Gonzalez C, Schlegel HB (1990) Reaction path following in mass-weighted internal coordinates. *J. Phys. Chem.* 94:5523–5527.
- [11] Cossi M, Rega N, Scalmani G, Barone VJ (2003) Energies, structures, and electronic properties of molecules in solution with the C-PCM solvation model. *J. Comput. Chem.* 24:669–681.
- [12] Gaussian 03 Revision E.02 (2004) Frisch MJ, Trucks GW, Schlegel HB, Scuseria GE, Robb MA, Cheeseman JR, Montgomery Jr JA, Vreven T, Kudin KN, Burant JC, Millam JM, Iyengar SS, Tomasi J, Barone V, Mennucci B, Cossi M, Scalmani G, Rega N, Petersson GA, Nakatsuji H, Hada M, Ehara M, Toyota K, Fukuda R, Hasegawa J, Ishida M, Nakajima T, Honda Y, Kitao O, Nakai H, Klene M, Li X, Knox JE, Hratchian HP, Cross JB, Bakken V, Adamo C, Jaramillo J, Gomperts R, Stratmann RE, Yazyev O, Austin AJ, Cammi R, Pomelli C, Ochterski JW, Ayala PY, Morokuma K, Voth GA, Salvador P, Dannenberg JJ, Zakrzewski VG, Dapprich S, Daniels AD, Strain MC, Farkas O, Malick DK, Rabuck AD, Raghavachari K, Foresman JB, Ortiz JV, Cui Q, Baboul AG, Clifford S, Cioslowski J, Stefanov BB, Liu G, Liashenko A, Piskorz P, Komaromi I, Martin RL, Fox DJ, Keith T, Al-Laham MA, Peng CY, Nanayakkara A, Challacombe M, Gill PMW, Johnson B, Chen W, Wong MW, Gonzalez Cand, Pople JA, Gaussian Inc Wallingford CT.
- [13] Takano Y, Houk KN (2005) Benchmarking the conductor-like polarizable continuum model (CPCM) for aqueous solvation free energies of neutral and ionic organic molecules. *J. Chem. Theory Comput.* 1:70–77.
- [14] Noodleman L, Lovell T, Han WG, Li J, Himo F (2004) Quantum chemical studies of intermediates and reaction pathways in selected enzymes and catalytic synthetic systems. *Chem. Rev.* 104:459–508.
- [15] Siegbahn PEM, Blomberg MRA (2000) Transition-metal systems in biochemistry studied by high-accuracy quantum chemical methods. *Chem. Rev.* 100:421–437.
- [16] Curtiss LA, Redfern PC, Raghavachari K (2007) Gaussian-4 theory. *J. Chem. Phys.* 126:084108-1–12.

**Table S1. Melting points of the WT and mutant proteins of Prx2 and Prx3.**

| <b>Prx 3</b>   | <b>Melting point (°C)</b> |
|----------------|---------------------------|
| recombinant WT | 68                        |
| Commercial     | ~71                       |
| R146K          | ~71                       |
| R146G          | ~73                       |
| R123G          | ~69                       |
| R123G/R146G    | ~71                       |
| R146A          | ~77                       |
| R146H          | ~84                       |

  

| <b>Prx 2</b>   | <b>Melting point (°C)</b> |
|----------------|---------------------------|
| recombinant WT | ~52                       |
| R150K          | ~49                       |
| R127K          | ~49                       |
| R127K/R150K    | ~50                       |

**Table S2. Enthalpies ( $\Delta H_{298}$ ) and Gibbs free energies ( $\Delta G_{298}$ ) associated with the reactions in Figure 4 of the main text and Figure S2 ( $\text{kJ mol}^{-1}$ ).<sup>a</sup> Calculations were performed in the gas-phase (calculated at the G4//B3-LYP/6-31+G(2df,p) level) and in the enzyme-like environment (calculated at the CPCM-G4//B3-LYP/6-31+G(2df,p) level)**

|                                                         |                                        | $\Delta H_{298}^b$ | $\Delta G_{298}^b$ | $\Delta H_{298}^c$ | $\Delta G_{298}^c$ |
|---------------------------------------------------------|----------------------------------------|--------------------|--------------------|--------------------|--------------------|
| Uncat <sup>d</sup>                                      | RC                                     | 5.2                | 37.1               |                    |                    |
|                                                         | TS                                     | 67.2               | 99.7               |                    |                    |
|                                                         | PC                                     | -176.7             | -145.7             |                    |                    |
|                                                         | $\Delta H^\ddagger, \Delta G^\ddagger$ | 67.2 <sup>e</sup>  | 99.7 <sup>e</sup>  |                    |                    |
| Uncat                                                   | RC                                     | -21.2              | 10.6               | -100.3             | -68.5              |
|                                                         | TS                                     | 49.4               | 81.9               | -7.4               | 25.0               |
|                                                         | PC                                     | -195.2             | -164.2             | -256.0             | -225.0             |
|                                                         | $\Delta H^\ddagger, \Delta G^\ddagger$ | 70.6               | 81.9 <sup>d</sup>  | 92.9               | 93.5               |
| [FH...O <sub>a</sub> ]                                  | RC                                     | -50.5              | 18.5               | -172.2             | -103.2             |
|                                                         | TS                                     | 6.3                | 74.4               | -81.1              | -13.1              |
|                                                         | PC                                     | -269.5             | -208.7             | -365.7             | -304.9             |
|                                                         | $\Delta H^\ddagger, \Delta G^\ddagger$ | 56.8               | 55.9               | 91.1               | 90.1               |
| [O <sub>b</sub> ...HF]                                  | RC                                     | -50.5              | 18.6               | -172.2             | -103.2             |
|                                                         | TS                                     | 5.3                | 72.4               | -80.9              | -13.7              |
|                                                         | PC                                     | -246.3             | -178.6             | -350.7             | -283.1             |
|                                                         | $\Delta H^\ddagger, \Delta G^\ddagger$ | 55.7               | 53.9               | 91.3               | 89.4               |
| [FH...S]                                                | RC                                     | -51.1              | 10.1               | -176.5             | -115.3             |
|                                                         | TS                                     | 14.0               | 78.9               | -83.0              | -18.1              |
|                                                         | PC                                     | -223.7             | -160.2             | -327.5             | -264.1             |
|                                                         | $\Delta H^\ddagger, \Delta G^\ddagger$ | 65.1               | 68.8               | 93.5               | 97.2               |
| [FH...O <sub>a</sub> ,O <sub>b</sub> ...HF]             | RC                                     | -67.8              | 35.1               | -227.8             | -124.9             |
|                                                         | TS                                     | -15.7              | 89.6               | -152.7             | -47.3              |
|                                                         | PC                                     | -303.3             | -206.6             | -445.5             | -348.9             |
|                                                         | $\Delta H^\ddagger, \Delta G^\ddagger$ | 52.1               | 54.5               | 75.1               | 77.5               |
| [FH...S,O <sub>a</sub> ...HF]                           | RC                                     | -70.0              | 36.9               | -243.1             | -136.2             |
|                                                         | TS                                     | -13.5              | 88.9               | -154.8             | -52.5              |
|                                                         | PC                                     | -268.0             | -169.2             | -422.9             | -324.1             |
|                                                         | $\Delta H^\ddagger, \Delta G^\ddagger$ | 56.6               | 52.0               | 88.3               | 83.8               |
| [FH...S,O <sub>b</sub> ...HF]                           | RC                                     | -75.9              | 22.8               | -240.8             | -142.1             |
|                                                         | TS                                     | -28.1              | 71.2               | -156.5             | -57.2              |
|                                                         | PC                                     | -264.3             | -164.4             | -410.1             | -310.3             |
|                                                         | $\Delta H^\ddagger, \Delta G^\ddagger$ | 47.8               | 48.4               | 84.3               | 84.9               |
| [2FH...S,O <sub>a</sub> ,O <sub>b</sub> ...HF]          | RC                                     | -90.1              | 41.3               | -289.5             | -158.0             |
|                                                         | TS                                     | -40.4              | 96.2               | -214.9             | -78.3              |
|                                                         | PC                                     | -303.6             | -168.1             | -494.5             | -359.1             |
|                                                         | $\Delta H^\ddagger, \Delta G^\ddagger$ | 49.7               | 54.8               | 74.6               | 79.8               |
| [Gua <sup>+</sup> ...S,O <sub>a</sub> ,O <sub>b</sub> ] | RC                                     | -126.8             | -52.3              | -528.1             | -453.6             |
|                                                         | TS                                     | -82.0              | -1.7               | -466.9             | -386.6             |
|                                                         | PC                                     | -321.7             | -245.4             | -769.4             | -693.1             |
|                                                         | $\Delta H^\ddagger, \Delta G^\ddagger$ | 44.8               | 50.6               | 61.2               | 67.1               |



|                                                                               |                                        |        |        |         |        |
|-------------------------------------------------------------------------------|----------------------------------------|--------|--------|---------|--------|
| [H <sub>2</sub> C=NH•••S,O <sub>a</sub> ,O <sub>b</sub> •••Gua <sup>+</sup> ] | RC                                     | -362.5 | -246.6 | -806.1  | -690.1 |
|                                                                               | TS                                     | -322.1 | -200.8 | -751.6  | -630.3 |
|                                                                               | PC                                     | -548.2 | -436.6 | -1029.9 | -918.4 |
|                                                                               | $\Delta H^\ddagger, \Delta G^\ddagger$ | 40.4   | 45.8   | 54.5    | 59.8   |
| [H <sub>2</sub> NH•••S,O <sub>a</sub> ,O <sub>b</sub> •••Gua <sup>+</sup> ]   | RC                                     | -348.9 | -233.5 | -785.4  | -670.1 |
|                                                                               | TS                                     | -310.6 | -189.3 | -731.9  | -610.6 |
|                                                                               | PC                                     | -540.5 | -437.8 | -1008.7 | -906.0 |
|                                                                               | $\Delta H^\ddagger, \Delta G^\ddagger$ | 38.3   | 44.3   | 53.6    | 59.5   |
| [HOH•••S,O <sub>a</sub> ,O <sub>b</sub> •••Gua <sup>+</sup> ]                 | RC                                     | -129.4 | -8.5   | -578.7  | -457.8 |
|                                                                               | TS                                     | -97.3  | 22.9   | -519.8  | -399.6 |
|                                                                               | PC                                     | -316.5 | -203.8 | -793.6  | -680.9 |
|                                                                               | $\Delta H^\ddagger, \Delta G^\ddagger$ | 32.2   | 31.5   | 58.9    | 58.2   |
| [FH•••S,O <sub>a</sub> ,O <sub>b</sub> •••Gua <sup>+</sup> ]                  | RC                                     | -141.5 | -21.9  | -594.4  | -474.8 |
|                                                                               | TS                                     | -115.1 | 5.2    | -535.5  | -415.2 |
|                                                                               | PC                                     | -320.5 | -207.2 | -799.0  | -685.7 |
|                                                                               | $\Delta H^\ddagger, \Delta G^\ddagger$ | 26.4   | 27.1   | 58.9    | 59.6   |
| [Gua <sup>+</sup> •••S,O <sub>a</sub> ]                                       | RC                                     | -126.8 | -52.3  | -528.1  | -453.6 |
|                                                                               | TS                                     | -78.6  | 2.0    | -476.3  | -395.7 |
|                                                                               | PC                                     | -321.7 | -245.4 | -769.4  | -693.1 |
|                                                                               | $\Delta H^\ddagger, \Delta G^\ddagger$ | 48.2   | 54.3   | 51.9    | 58.0   |
| [Gua <sup>+</sup> •••S,O <sub>a</sub> ,O <sub>b</sub> •••HOH]                 | RC                                     | -134.7 | -24.3  | -572.8  | -462.3 |
|                                                                               | TS                                     | -94.7  | 25.8   | -526.0  | -405.5 |
|                                                                               | PC                                     | -324.4 | -217.4 | -802.0  | -695.0 |
|                                                                               | $\Delta H^\ddagger, \Delta G^\ddagger$ | 40.1   | 50.1   | 46.8    | 56.8   |
| [Gua <sup>+</sup> •••S,O <sub>a</sub> ,O <sub>b</sub> •••HF]                  | RC                                     | -143.1 | -30.2  | -585.6  | -472.7 |
|                                                                               | TS                                     | -115.3 | 3.6    | -544.5  | -425.7 |
|                                                                               | PC                                     | -371.5 | -257.8 | -822.7  | -709.0 |
|                                                                               | $\Delta H^\ddagger, \Delta G^\ddagger$ | 27.8   | 33.8   | 41.0    | 47.0   |

<sup>a</sup>RC = reactant complex, TS = transition state, PC = product complex,  $\Delta H^\ddagger, \Delta G^\ddagger$  = barrier relative to the RC unless otherwise specified. <sup>b</sup>In enzyme-like medium ( $\epsilon = 4.0$ ), unless otherwise noted. <sup>c</sup>In the gas-phase. <sup>d</sup>In aqueous solution ( $\epsilon = 78.4$ ). <sup>e</sup>Relative to the free reactants (see main text).

**Table S3.** Gas-phase G4//B3-LYP/6-31+G(2df,p) vibrationless energies ( $E_e$ ), energies at 0 K ( $E_0$ ), enthalpies at 298 K ( $H_{298}(g)$ ), and Gibbs free energies at 298 K ( $G_{298}(g)$ ), as well as aqueous-phase ( $\epsilon = 78.4$ ) enthalpies at 298 K ( $H_{298}(aq)$ ) and Gibbs free energies at 298 K ( $G_{298}(aq)$ ), and enzyme-like phase ( $\epsilon = 4.0$ ) enthalpies at 298 K ( $H_{298}(enz)$ ) and Gibbs free energies at 298 K ( $G_{298}(enz)$ ) calculated at the CPCM-G4//B3-LYP/6-31+G(2df,p) level for the species in Figure 4 of the main text and Figure S2 (Hartree).

|                                               | $(E_e)$     | $(E_0)$     | $H_{298}(g)$ | $H_{298}(aq)$ | $H_{298}(enz)$ | $G_{298}(g)$ | $G_{298}(aq)$ | $G_{298}(enz)$ |
|-----------------------------------------------|-------------|-------------|--------------|---------------|----------------|--------------|---------------|----------------|
| HS <sup>-</sup>                               | -398.704223 | -398.698343 | -398.695039  | -398.807181   | -398.779851    | -398.716086  | -398.828227   | -398.800897    |
| H <sub>2</sub> O                              | -76.418287  | -76.397288  | -76.393442   | -76.405457    | -76.402063     | -76.414749   | -76.426765    | -76.423371     |
| H <sub>2</sub> O <sub>2</sub>                 | -151.520679 | -151.494513 | -151.490268  | -151.510810   | -151.505121    | -151.515916  | -151.536457   | -151.530768    |
| HSOH                                          | -474.454332 | -474.432219 | -474.427989  | -474.439097   | -474.435957    | -474.455521  | -474.466629   | -474.463489    |
| H <sub>2</sub> C=NH                           | -94.612138  | -94.572929  | -94.568906   | -94.577225    | -94.574277     | -94.594549   | -94.602867    | -94.599919     |
| CH <sub>6</sub> N <sub>3</sub> <sup>+</sup>   | -205.726510 | -205.639575 | -205.632877  | -205.748366   | -205.720573    | -205.666054  | -205.781542   | -205.753750    |
| HF                                            | -100.431554 | -100.422380 | -100.419061  | -100.429850   | -100.426631    | -100.438669  | -100.449458   | -100.446239    |
| NH <sub>3</sub>                               | -56.551556  | -56.517788  | -56.513841   | -56.521873    | -56.519642     | -56.536606   | -56.544637    | -56.542406     |
| Uncat-RC                                      | -550.264153 | -550.230050 | -550.223527  | -550.316004   | -550.293056    | -550.258088  | -550.350565   | -550.327617    |
| Uncat-TS                                      | -550.226034 | -550.194929 | -550.188141  | -550.292378   | -550.266148    | -550.222474  | -550.326711   | -550.300480    |
| Uncat-PC                                      | -550.322710 | -550.289419 | -550.282817  | -550.385301   | -550.359325    | -550.317706  | -550.420190   | -550.394215    |
| [FH•••O <sub>a</sub> ]-RC                     | -650.724748 | -650.678243 | -650.669951  | -650.751798   | -650.730843    | -650.709973  | -650.791820   | -650.770864    |
| [FH•••O <sub>a</sub> ]-TS                     | -650.687910 | -650.643930 | -650.635263  | -650.735549   | -650.709191    | -650.675644  | -650.775929   | -650.749571    |
| [FH•••O <sub>a</sub> ]-PC                     | -650.797768 | -650.752433 | -650.743645  | -650.838814   | -650.814241    | -650.786788  | -650.881958   | -650.857385    |
| [O <sub>b</sub> •••HF]-RC                     | -650.724747 | -650.678239 | -650.669949  | -650.751765   | -650.730825    | -650.709962  | -650.791777   | -650.770837    |
| [O <sub>b</sub> •••HF]-TS                     | -650.687525 | -650.643701 | -650.635192  | -650.735987   | -650.709597    | -650.675906  | -650.776702   | -650.750311    |
| [O <sub>b</sub> •••HF]-PC                     | -650.788789 | -650.746125 | -650.737961  | -650.828701   | -650.805402    | -650.778504  | -650.869243   | -650.845945    |
| [FH•••O <sub>a</sub> O <sub>b</sub> •••HF]-RC | -751.179221 | -751.120670 | -751.110182  | -751.183710   | -751.164061    | -751.156896  | -751.230425   | -751.210775    |
| [FH•••O <sub>a</sub> O <sub>b</sub> •••HF]-TS | -751.148595 | -751.091954 | -751.081582  | -751.167238   | -751.144227    | -751.127366  | -751.213022   | -751.190011    |
| [FH•••O <sub>a</sub> O <sub>b</sub> •••HF]-PC | -751.262080 | -751.203610 | -751.193117  | -751.275618   | -751.253737    | -751.242228  | -751.324729   | -751.302849    |
| [FH•••S]-RC                                   | -650.726217 | -650.680554 | -650.671588  | -650.751682   | -650.731061    | -650.714571  | -650.794665   | -650.774044    |
| [FH•••S]-TS                                   | -650.687797 | -650.644892 | -650.635976  | -650.730747   | -650.706270    | -650.677556  | -650.772327   | -650.747849    |
| [FH•••S]-PC                                   | -650.783140 | -650.737984 | -650.729120  | -650.820593   | -650.796816    | -650.771242  | -650.862715   | -650.838938    |
| [FH•••S,O <sub>a</sub> •••HF]-RC              | -751.184748 | -751.126241 | -751.116035  | -751.183142   | -751.164911    | -751.161225  | -751.228331   | -751.210100    |
| [FH•••S,O <sub>a</sub> •••HF]-TS              | -751.149241 | -751.093093 | -751.082391  | -751.165641   | -751.143362    | -751.129318  | -751.212568   | -751.190289    |
| [FH•••S,O <sub>a</sub> •••HF]-PC              | -751.252979 | -751.195391 | -751.184505  | -751.260743   | -751.240313    | -751.232797  | -751.309035   | -751.288605    |
| [FH•••S,O <sub>b</sub> •••HF]-RC              | -751.184296 | -751.125948 | -751.115132  | -751.186222   | -751.167131    | -751.163462  | -751.234552   | -751.215461    |
| [FH•••S,O <sub>b</sub> •••HF]-TS              | -751.149790 | -751.093849 | -751.083040  | -751.173015   | -751.148936    | -751.131141  | -751.221115   | -751.197036    |
| [FH•••S,O <sub>b</sub> •••HF]-PC              | -751.247279 | -751.190145 | -751.179643  | -751.260343   | -751.238893    | -751.227510  | -751.308210   | -751.286760    |

|                                                                                              |             |             |             |             |             |             |             |             |
|----------------------------------------------------------------------------------------------|-------------|-------------|-------------|-------------|-------------|-------------|-------------|-------------|
| [2FH•••S <sub>a</sub> O <sub>a</sub> O <sub>b</sub> •••HF]-RC                                | -851.636392 | -851.565877 | -851.552744 | -851.617461 | -851.599182 | -851.608199 | -851.672915 | -851.654637 |
| [2FH•••S <sub>a</sub> O <sub>a</sub> O <sub>b</sub> •••HF]-TS                                | -851.606014 | -851.537135 | -851.524328 | -851.601953 | -851.580264 | -851.577817 | -851.655441 | -851.633753 |
| [2FH•••S <sub>a</sub> O <sub>a</sub> O <sub>b</sub> •••HF]-PC                                | -851.714235 | -851.643541 | -851.630841 | -851.699414 | -851.680482 | -851.684783 | -851.753356 | -851.734424 |
| [Gua <sup>+</sup> •••S <sub>a</sub> O <sub>a</sub> O <sub>b</sub> ]-RC                       | -756.152970 | -756.032593 | -756.019343 | -756.068267 | -756.053845 | -756.070839 | -756.119763 | -756.105341 |
| [Gua <sup>+</sup> •••S <sub>a</sub> O <sub>a</sub> O <sub>b</sub> ]-TS                       | -756.128395 | -756.008900 | -755.996022 | -756.053152 | -756.036786 | -756.045286 | -756.102416 | -756.086050 |
| [Gua <sup>+</sup> •••S <sub>a</sub> O <sub>a</sub> O <sub>b</sub> ]-PC                       | -756.247642 | -756.124140 | -756.111248 | -756.136188 | -756.128076 | -756.162059 | -756.186999 | -756.178887 |
| [FH•••S <sub>a</sub> O <sub>a</sub> O <sub>b</sub> •••Gua <sup>+</sup> ]-RC                  | -856.612438 | -856.478349 | -856.463635 | -856.497196 | -856.486073 | -856.517559 | -856.551120 | -856.539997 |
| [FH•••S <sub>a</sub> O <sub>a</sub> O <sub>b</sub> •••Gua <sup>+</sup> ]-TS                  | -856.588492 | -856.455750 | -856.441208 | -856.491088 | -856.476012 | -856.494854 | -856.544734 | -856.529658 |
| [FH•••S <sub>a</sub> O <sub>a</sub> O <sub>b</sub> •••Gua <sup>+</sup> ]-PC                  | -856.691929 | -856.556656 | -856.541551 | -856.561965 | -856.554237 | -856.597880 | -856.618294 | -856.610565 |
| [HOH•••S <sub>a</sub> O <sub>a</sub> O <sub>b</sub> •••Gua <sup>+</sup> ]-RC                 | -832.595104 | -832.447602 | -832.432049 | -832.468686 | -832.456909 | -832.487169 | -832.523806 | -832.512030 |
| [HOH•••S <sub>a</sub> O <sub>a</sub> O <sub>b</sub> •••Gua <sup>+</sup> ]-TS                 | -832.570182 | -832.425157 | -832.409604 | -832.459898 | -832.444664 | -832.464990 | -832.515284 | -832.500049 |
| [HOH•••S <sub>a</sub> O <sub>a</sub> O <sub>b</sub> •••Gua <sup>+</sup> ]-PC                 | -832.677281 | -832.530132 | -832.513895 | -832.536540 | -832.528158 | -832.572145 | -832.594790 | -832.586408 |
| [H <sub>2</sub> C=NH•••S <sub>a</sub> O <sub>a</sub> O <sub>b</sub> •••Gua <sup>+</sup> ]-RC | -850.874555 | -850.711424 | -850.694114 | -850.730465 | -850.717907 | -850.755467 | -850.791817 | -850.779259 |
| [H <sub>2</sub> C=NH•••S <sub>a</sub> O <sub>a</sub> O <sub>b</sub> •••Gua <sup>+</sup> ]-TS | -850.852237 | -850.690197 | -850.673358 | -850.716831 | -850.702505 | -850.732682 | -850.776155 | -850.761828 |
| [H <sub>2</sub> C=NH•••S <sub>a</sub> O <sub>a</sub> O <sub>b</sub> •••Gua <sup>+</sup> ]-PC | -850.961112 | -850.796803 | -850.779373 | -850.796409 | -850.788616 | -850.842401 | -850.859437 | -850.851644 |
| [H <sub>2</sub> NH•••S <sub>a</sub> O <sub>a</sub> O <sub>b</sub> •••Gua <sup>+</sup> ]-RC   | -812.806219 | -812.647766 | -812.631179 | -812.670748 | -812.658063 | -812.689889 | -812.729458 | -812.716773 |
| [H <sub>2</sub> NH•••S <sub>a</sub> O <sub>a</sub> O <sub>b</sub> •••Gua <sup>+</sup> ]-TS   | -812.784314 | -812.626822 | -812.610779 | -812.658061 | -812.643480 | -812.667215 | -812.714497 | -812.699915 |
| [H <sub>2</sub> NH•••S <sub>a</sub> O <sub>a</sub> O <sub>b</sub> •••Gua <sup>+</sup> ]-PC   | -812.892554 | -812.733422 | -812.716201 | -812.739468 | -812.731054 | -812.779724 | -812.802990 | -812.794576 |
| [Gua <sup>+</sup> •••S <sub>a</sub> ]-RC                                                     | -756.152970 | -756.032593 | -756.019343 | -756.068267 | -756.053845 | -756.070839 | -756.119763 | -756.105341 |
| [Gua <sup>+</sup> •••S <sub>a</sub> ]-TS                                                     | -756.132072 | -756.012405 | -755.999585 | -756.049863 | -756.035489 | -756.048753 | -756.099031 | -756.084657 |
| [Gua <sup>+</sup> •••S <sub>a</sub> ]-PC                                                     | -756.247642 | -756.124140 | -756.111248 | -756.136188 | -756.128076 | -756.162059 | -756.186999 | -756.178887 |
| [Gua <sup>+</sup> •••S <sub>a</sub> O <sub>a</sub> O <sub>b</sub> •••HF]-RC                  | -856.610174 | -856.475545 | -856.460277 | -856.499320 | -856.486667 | -856.516776 | -856.555819 | -856.543166 |
| [Gua <sup>+</sup> •••S <sub>a</sub> O <sub>a</sub> O <sub>b</sub> •••HF]-TS                  | -856.592375 | -856.459350 | -856.444647 | -856.489810 | -856.476073 | -856.498857 | -856.544019 | -856.530283 |
| [Gua <sup>+</sup> •••S <sub>a</sub> O <sub>a</sub> O <sub>b</sub> •••HF]-PC                  | -856.701733 | -856.565484 | -856.550605 | -856.584469 | -856.573681 | -856.606782 | -856.640646 | -856.629857 |
| [Gua <sup>+</sup> •••S <sub>a</sub> O <sub>a</sub> O <sub>b</sub> •••HOH]-RC                 | -832.592433 | -832.446292 | -832.429793 | -832.472693 | -832.458924 | -832.488902 | -832.531802 | -832.518033 |
| [Gua <sup>+</sup> •••S <sub>a</sub> O <sub>a</sub> O <sub>b</sub> •••HOH]-TS                 | -832.572499 | -832.427472 | -832.411969 | -832.457593 | -832.443665 | -832.467267 | -832.512892 | -832.498964 |
| [Gua <sup>+</sup> •••S <sub>a</sub> O <sub>a</sub> O <sub>b</sub> •••HOH]-PC                 | -832.680353 | -832.533397 | -832.517085 | -832.539395 | -832.531156 | -832.577518 | -832.599829 | -832.591590 |

**Table S4. Selected bond lengths (Å) and angles (degrees) for the gas-phase transition structures in Figure 4 of the main text and Figure S2.** Calculations were performed at the B3-LYP/6-31+G(2df,p) level of theory.

| Reaction                                                      | S–O <sub>a</sub> | O <sub>a</sub> –O <sub>b</sub> | ∠SO <sub>a</sub> O <sub>b</sub> | O <sub>a</sub> •••H <sup>a</sup> | O <sub>b</sub> •••H <sup>b</sup> |
|---------------------------------------------------------------|------------------|--------------------------------|---------------------------------|----------------------------------|----------------------------------|
| Uncat                                                         | 2.373            | 1.804                          | 170.5                           |                                  |                                  |
| [FH•••O <sub>a</sub> ]                                        | 2.441            | 1.771                          | 165.9                           | 1.607                            |                                  |
| [O <sub>b</sub> •••HF]                                        | 2.597            | 1.666                          | 159.4                           |                                  | 1.515                            |
| [FH•••O <sub>a</sub> ,O <sub>b</sub> •••HF]                   | 2.573            | 1.684                          | 156.5                           | 1.574                            | 1.542                            |
| [FH•••S,O <sub>a</sub> •••HF]                                 | 2.261            | 1.893                          | 169.3                           | 1.559                            |                                  |
| [FH•••S,O <sub>b</sub> •••HF]                                 | 2.529            | 1.678                          | 165.9                           |                                  | 1.528                            |
| [2FH•••S,O <sub>a</sub> ,O <sub>b</sub> •••HF]                | 2.530            | 1.687                          | 162.9                           | 1.615                            | 1.555                            |
| [Gua <sup>+</sup> •••S,O <sub>a</sub> ,O <sub>b</sub> ]       | 2.543            | 1.655                          | 170.1                           | 2.026                            | 1.799                            |
| [FH•••S,O <sub>a</sub> ,O <sub>b</sub> •••Gua <sup>+</sup> ]  | 2.557            | 1.666                          | 171.9                           | 1.745                            | 1.783                            |
| [HOH•••S,O <sub>a</sub> ,O <sub>b</sub> •••Gua <sup>+</sup> ] | 2.583            | 1.652                          | 168.6                           | 1.781                            | 1.774                            |
| [Gua <sup>+</sup> •••S,O <sub>a</sub> ]                       | 2.365            | 1.796                          | 174.9                           | 1.612                            |                                  |
| [Gua <sup>+</sup> •••S,O <sub>a</sub> ,O <sub>b</sub> •••HF]  | 2.585            | 1.644                          | 168.7                           | 1.934                            | 1.497                            |
| [Gua <sup>+</sup> •••S,O <sub>a</sub> ,O <sub>b</sub> •••HOH] | 2.500            | 1.699                          | 171.7                           | 1.780                            | 1.745                            |

<sup>a</sup>Length of the hydrogen bond to O<sub>a</sub>. <sup>b</sup>Length of the hydrogen bond to O<sub>b</sub>.

**Table S5. Reference gas-phase geometries.** Geometries were optimized at the B3-LYP/6-31+G(2df,p) level of theory for all of the species considered in the theoretical investigation (Cartesian coordinates, Å).

|                                             |           |           |           |
|---------------------------------------------|-----------|-----------|-----------|
| =====                                       |           |           |           |
| HS <sup>-</sup>                             |           |           |           |
| =====                                       |           |           |           |
| H                                           | 0.000000  | 0.000000  | -1.272201 |
| S                                           | 0.000000  | 0.000000  | 0.079513  |
| =====                                       |           |           |           |
| H <sub>2</sub> O                            |           |           |           |
| =====                                       |           |           |           |
| O                                           | 0.000000  | 0.000000  | 0.116673  |
| H                                           | 0.000000  | 0.766022  | -0.466693 |
| H                                           | 0.000000  | -0.766022 | -0.466693 |
| =====                                       |           |           |           |
| H <sub>2</sub> O <sub>2</sub>               |           |           |           |
| =====                                       |           |           |           |
| H                                           | 0.793783  | 0.906388  | 0.465504  |
| O                                           | 0.000000  | 0.724255  | -0.058188 |
| O                                           | 0.000000  | -0.724255 | -0.058188 |
| H                                           | -0.793783 | -0.906388 | 0.465504  |
| =====                                       |           |           |           |
| HSOH                                        |           |           |           |
| =====                                       |           |           |           |
| S                                           | -0.581447 | -0.090054 | 0.009229  |
| H                                           | -0.867378 | 1.233607  | 0.017845  |
| O                                           | 1.089774  | 0.023713  | -0.117812 |
| H                                           | 1.452347  | 0.017548  | 0.776984  |
| =====                                       |           |           |           |
| H <sub>2</sub> C=NH                         |           |           |           |
| =====                                       |           |           |           |
| H                                           | -0.897316 | -1.054395 | 0.000000  |
| N                                           | 0.056070  | -0.683562 | 0.000000  |
| C                                           | 0.056070  | 0.585598  | 0.000000  |
| H                                           | 1.012861  | 1.113073  | 0.000000  |
| H                                           | -0.844458 | 1.212671  | 0.000000  |
| =====                                       |           |           |           |
| CH <sub>6</sub> N <sub>3</sub> <sup>+</sup> |           |           |           |
| =====                                       |           |           |           |
| H                                           | 0.389036  | 2.006815  | -0.151204 |
| N                                           | -0.311337 | 1.297256  | -0.000002 |
| H                                           | -1.257452 | 1.611665  | 0.151229  |
| C                                           | 0.000000  | 0.000000  | -0.000005 |
| N                                           | 1.279126  | -0.379002 | -0.000002 |
| H                                           | 2.024468  | 0.283153  | 0.151229  |
| H                                           | 1.543434  | -1.340321 | -0.151204 |
| N                                           | -0.967788 | -0.918255 | -0.000002 |
| H                                           | -1.932470 | -0.666492 | -0.151204 |

H -0.767016 -1.894817 0.151229

=====  
HF  
=====

F 0.000000 0.000000 0.092373  
H 0.000000 0.000000 -0.831361

=====  
NH<sub>3</sub>  
=====

N 0.000000 0.111122 0.000000  
H -0.945753 -0.259088 0.000000  
H 0.472877 -0.259384 0.818974  
H 0.472877 -0.259384 -0.818974

=====  
=====  
=====  
Ucat-RC  
=====

O 1.547853 -0.731266 0.005801  
O 1.547851 0.731266 0.005802  
H 0.566898 0.896901 -0.019656  
H 0.566901 -0.896901 -0.019653  
S -1.514028 0.000000 -0.081942  
H -1.674991 0.000000 1.257553

=====  
=====  
=====  
Ucat-TS  
=====

O -0.690851 -0.038291 -0.144520  
O -2.484570 -0.063460 0.048525  
H -2.548838 0.880857 -0.132104  
H -0.578922 -0.391603 0.744995  
S 1.678282 -0.058008 -0.009258  
H 1.678619 1.252884 0.303203

=====  
=====  
=====  
Ucat-PC  
=====

O 0.102090 0.892248 0.031709  
O -2.274403 -0.187394 0.019792  
H -2.037269 -1.093238 -0.198999  
H -1.364481 0.279669 0.033811  
S 1.209118 -0.260043 -0.090896  
H 1.434376 -0.664570 1.207507

=====  
=====  
=====  
[FH...O<sub>a</sub>]-RC  
=====

O 0.735862 0.332350 0.619168  
O 0.376586 1.408541 -0.295580  
H -0.549275 1.109270 -0.524030  
H -0.117922 -0.219592 0.574728

|   |           |           |           |
|---|-----------|-----------|-----------|
| H | 2.018941  | -0.351009 | 0.073786  |
| S | -2.078983 | -0.473692 | -0.121999 |
| H | -2.627500 | 0.190865  | 0.915406  |
| F | 2.848877  | -0.786399 | -0.186289 |

=====  
[FH•••O<sub>a</sub>]-TS  
=====

|   |           |           |           |
|---|-----------|-----------|-----------|
| O | -0.402768 | -0.542484 | 0.089762  |
| O | -2.024710 | -1.222705 | -0.118727 |
| H | -1.977795 | -1.704370 | 0.715509  |
| H | -0.090715 | -0.846989 | -0.772070 |
| H | -0.922231 | 0.977697  | 0.041358  |
| S | 1.975481  | -0.007085 | -0.044359 |
| H | 2.190804  | -1.120373 | 0.683411  |
| F | -1.265326 | 1.880989  | 0.030362  |

=====  
[FH•••O<sub>a</sub>]-PC  
=====

|   |           |           |           |
|---|-----------|-----------|-----------|
| O | 0.735356  | -0.401670 | -0.631591 |
| O | -3.264394 | -0.443562 | 0.195556  |
| H | -2.466746 | 0.159374  | 0.124955  |
| H | -2.916361 | -1.294261 | -0.086150 |
| H | -0.078937 | 0.268081  | -0.347532 |
| S | 2.110967  | -0.040597 | 0.173686  |
| H | 1.905613  | -0.671245 | 1.364855  |
| F | -1.109638 | 0.994384  | -0.038536 |

=====  
[O<sub>b</sub>•••HF]-RC  
=====

|   |           |           |           |
|---|-----------|-----------|-----------|
| O | -0.376338 | 1.408733  | -0.295901 |
| O | -0.736066 | 0.333028  | 0.619280  |
| H | 0.117576  | -0.219108 | 0.574996  |
| H | 0.549666  | 1.109392  | -0.523722 |
| S | 2.078621  | -0.473858 | -0.121972 |
| H | 2.627295  | 0.189929  | 0.915941  |
| H | -2.018438 | -0.351208 | 0.073726  |
| F | -2.848311 | -0.786818 | -0.186269 |

=====  
[O<sub>b</sub>•••HF]-TS  
=====

|   |           |           |           |
|---|-----------|-----------|-----------|
| O | 0.131920  | 0.784627  | -0.150912 |
| O | -1.517787 | 0.986291  | -0.040697 |
| H | -1.509916 | 1.379030  | 0.840009  |
| H | 0.252537  | -0.176394 | -0.009338 |
| S | 2.451632  | -0.377054 | -0.044009 |
| H | 2.574088  | 0.024775  | 1.237229  |
| H | -2.382142 | -0.257569 | -0.022193 |
| F | -3.008193 | -1.011591 | 0.021256  |

[O<sub>b</sub>•••HF]-PC

|   |           |           |           |
|---|-----------|-----------|-----------|
| O | 0.849854  | 0.801501  | 0.207381  |
| O | -1.168179 | -0.568447 | 0.256284  |
| H | -1.019913 | -1.318041 | -0.326814 |
| H | -0.094502 | 0.169063  | 0.211761  |
| S | 2.133028  | -0.117889 | -0.196881 |
| H | 2.468976  | -0.681233 | 1.000578  |
| H | -2.407689 | -0.104170 | 0.020297  |
| F | -3.392080 | 0.217352  | -0.162783 |

[FH•••O<sub>a</sub>,O<sub>b</sub>•••HF]-RC

|   |           |           |           |
|---|-----------|-----------|-----------|
| O | 0.196894  | -0.727033 | 0.741671  |
| O | 0.197196  | 0.725465  | 0.742063  |
| H | -0.723348 | 0.877602  | 0.327848  |
| H | -0.723506 | -0.878488 | 0.326941  |
| H | 1.421156  | -1.449978 | -0.012318 |
| S | -2.474663 | -0.000035 | -0.393040 |
| H | -3.068397 | -0.000845 | 0.817475  |
| F | 2.118492  | -1.990765 | -0.390857 |
| H | 1.420470  | 1.449796  | -0.011899 |
| F | 2.116565  | 1.992433  | -0.390174 |

[FH•••O<sub>a</sub>,O<sub>b</sub>•••HF]-TS

|   |           |           |           |
|---|-----------|-----------|-----------|
| O | -0.049446 | -0.089895 | 0.062454  |
| O | 1.457636  | 0.141972  | 0.777726  |
| H | 1.517605  | 1.092096  | 0.596531  |
| H | -0.602242 | -0.413867 | 0.807459  |
| H | -0.291911 | 1.437060  | -0.232427 |
| S | -2.539915 | -0.726899 | -0.038304 |
| H | -2.144620 | -1.884297 | -0.602798 |
| F | -0.125817 | 2.390962  | -0.310117 |
| H | 2.530366  | -0.639623 | -0.006589 |
| F | 3.277366  | -1.099584 | -0.431077 |

[FH•••O<sub>a</sub>,O<sub>b</sub>•••HF]-PC

|   |           |           |           |
|---|-----------|-----------|-----------|
| O | -1.729300 | -0.440765 | -0.598089 |
| O | 2.283249  | -0.631560 | -0.361710 |
| H | 1.416275  | -0.581950 | 0.218789  |
| H | 1.978929  | -0.509061 | -1.265421 |
| H | -0.937646 | -0.479589 | 0.086974  |
| S | -2.997553 | 0.384665  | 0.039567  |
| H | -2.626805 | 1.668543  | -0.217745 |
| F | 0.189384  | -0.539843 | 0.905454  |
| H | 3.463534  | 0.227906  | -0.092637 |
| F | 4.281167  | 0.772967  | 0.018476  |



=====  
 =====  
 =====  
 [FH...S]-RC  
 =====

|   |           |           |           |
|---|-----------|-----------|-----------|
| O | -1.981048 | 1.111742  | 0.138317  |
| O | -2.575225 | -0.184913 | -0.176736 |
| H | -1.763282 | -0.745764 | -0.218753 |
| H | -1.022863 | 0.864264  | 0.173536  |
| H | 2.249465  | 0.239539  | -0.059355 |
| S | 0.540970  | -0.837326 | -0.012240 |
| H | 0.572721  | -1.090836 | 1.310838  |
| F | 3.084292  | 0.746154  | -0.078119 |

=====  
 =====  
 =====  
 [FH...S]-TS  
 =====

|   |           |           |           |
|---|-----------|-----------|-----------|
| O | -1.262367 | 0.029536  | -0.056144 |
| O | -3.041470 | 0.675435  | -0.051393 |
| H | -2.881847 | 1.131447  | 0.782269  |
| H | -1.687931 | -0.803126 | -0.286565 |
| H | 2.069310  | 0.519983  | -0.036360 |
| S | 0.706390  | -1.004106 | -0.048842 |
| H | 0.682876  | -1.131408 | 1.291085  |
| F | 2.771783  | 1.189892  | -0.012074 |

=====  
 =====  
 =====  
 [FH...S]-PC  
 =====

|   |           |           |           |
|---|-----------|-----------|-----------|
| O | -0.649511 | 0.784030  | 0.160595  |
| O | -3.192357 | 0.072061  | -0.087588 |
| H | -3.088352 | -0.793004 | -0.493985 |
| H | -2.239466 | 0.388471  | 0.024021  |
| H | 2.225229  | 0.064889  | -0.075258 |
| S | 0.291646  | -0.478035 | -0.018347 |
| H | 0.435089  | -1.009197 | 1.245347  |
| F | 3.192900  | 0.238742  | -0.110070 |

=====  
 =====  
 =====  
 [FH...S<sub>a</sub>...HF]-RC  
 =====

|   |           |           |           |
|---|-----------|-----------|-----------|
| O | -1.028736 | -0.207692 | -0.839366 |
| O | -0.887332 | 1.225505  | -0.988461 |
| H | -0.317657 | 1.465742  | -0.225299 |
| H | -0.080425 | -0.536130 | -0.704316 |
| H | -2.133047 | -0.550020 | 0.220544  |
| S | 1.912489  | -0.942185 | -0.126376 |
| H | 1.523896  | -1.640143 | 0.958974  |
| F | -2.843851 | -0.798856 | 0.828350  |
| H | 1.478122  | 0.738855  | 0.621474  |
| F | 1.094722  | 1.627095  | 0.924234  |

=====

[FH...S,O<sub>a</sub>...HF]-TS

|   |           |           |           |
|---|-----------|-----------|-----------|
| O | -1.036202 | -0.525611 | 0.213659  |
| O | -2.861722 | -0.467898 | 0.710616  |
| H | -2.950970 | 0.484745  | 0.572968  |
| H | -1.372660 | -1.127449 | -0.459680 |
| H | -1.121950 | 0.934490  | -0.324673 |
| S | 1.046777  | -0.969879 | -0.543790 |
| H | 1.168707  | -1.844144 | 0.471288  |
| F | -1.295013 | 1.848137  | -0.612309 |
| H | 2.399877  | 0.360484  | 0.312078  |
| F | 3.107451  | 0.891642  | 0.693915  |

[FH...S,O<sub>a</sub>...HF]-PC

|   |           |           |           |
|---|-----------|-----------|-----------|
| O | -0.487498 | -0.406042 | -0.629714 |
| O | -3.185947 | -0.394640 | 0.298624  |
| H | -2.963711 | 0.545043  | 0.368949  |
| H | -2.344053 | -0.743855 | -0.051112 |
| H | -0.806254 | 0.870570  | -0.305048 |
| S | 0.846593  | -1.028354 | 0.012010  |
| H | 0.609825  | -0.978810 | 1.357909  |
| F | -1.194835 | 1.797594  | -0.034155 |
| H | 2.450983  | 0.274498  | 0.076870  |
| F | 3.294310  | 0.745925  | 0.146265  |

[FH...S,O<sub>b</sub>...HF]-RC

|   |           |           |           |
|---|-----------|-----------|-----------|
| O | 0.961156  | 1.224766  | -0.674592 |
| O | 1.627670  | -0.069332 | -0.692585 |
| H | 0.859097  | -0.670441 | -0.452042 |
| H | 0.035085  | 0.929247  | -0.470828 |
| S | -1.239759 | -0.951173 | -0.071518 |
| H | -1.568146 | -1.111811 | -1.368371 |
| H | 2.813946  | -0.030100 | 0.348555  |
| F | 3.583212  | -0.061380 | 0.932398  |
| H | -2.833225 | 0.240818  | 0.380780  |
| F | -3.603348 | 0.796667  | 0.583559  |

[FH...S,O<sub>b</sub>...HF]-TS

|   |           |           |           |
|---|-----------|-----------|-----------|
| O | 0.586159  | -0.149055 | 0.385905  |
| O | 2.148742  | 0.082317  | 0.952394  |
| H | 1.964042  | 0.931666  | 1.370558  |
| H | 0.445097  | -1.029510 | 0.764196  |
| S | -1.722431 | -1.029046 | -0.153044 |
| H | -1.356901 | -0.980464 | -1.447010 |
| H | 3.129619  | 0.273992  | -0.203856 |
| F | 3.835926  | 0.413418  | -0.865602 |

|   |           |          |           |
|---|-----------|----------|-----------|
| H | -2.801470 | 0.689117 | -0.120445 |
| F | -3.358226 | 1.488119 | -0.092301 |

=====  
[FH...S,O<sub>b</sub>...HF]-PC  
=====

|   |           |           |           |
|---|-----------|-----------|-----------|
| O | -0.135139 | -0.437911 | 0.408517  |
| O | 2.121623  | 0.580879  | 0.126796  |
| H | 2.009029  | 1.178610  | -0.617833 |
| H | 1.168125  | 0.116115  | 0.256235  |
| S | -1.252422 | 0.556461  | -0.148369 |
| H | -1.559276 | 1.360466  | 0.921279  |
| H | 3.367840  | -0.197867 | -0.034821 |
| F | 4.238577  | -0.654461 | -0.159474 |
| H | -3.078475 | -0.352279 | -0.095383 |
| F | -3.989726 | -0.695779 | -0.100313 |

=====  
[2HF...S,O<sub>a</sub>,O<sub>b</sub>...HF]-RC  
=====

|   |           |           |           |
|---|-----------|-----------|-----------|
| O | -0.763677 | 0.516990  | 0.908868  |
| O | -1.260014 | -0.823615 | 0.661001  |
| H | -0.418351 | -1.250674 | 0.313544  |
| H | 0.202028  | 0.389556  | 0.635309  |
| H | -1.577912 | 1.722991  | 0.161532  |
| S | 1.689289  | -0.992027 | -0.045078 |
| H | 2.053914  | -1.348042 | 1.202004  |
| F | -2.012932 | 2.497364  | -0.189861 |
| H | -2.564334 | -0.981496 | -0.319397 |
| F | -3.331800 | -1.211949 | -0.838643 |
| H | 3.271364  | 0.300652  | -0.346660 |
| F | 4.032976  | 0.880412  | -0.469723 |

=====  
[2HF...S,O<sub>a</sub>,O<sub>b</sub>...HF]-TS  
=====

|   |           |           |           |
|---|-----------|-----------|-----------|
| O | -0.642020 | -0.117638 | -0.357396 |
| O | -2.277835 | 0.237175  | -0.571243 |
| H | -2.216996 | 1.178638  | -0.348193 |
| H | -0.448104 | -0.439099 | -1.253349 |
| H | -0.218625 | 1.429674  | -0.175063 |
| S | 1.733116  | -0.901877 | -0.740642 |
| H | 1.398767  | -1.966463 | 0.011625  |
| F | -0.329138 | 2.382450  | -0.084179 |
| H | -3.128922 | -0.550685 | 0.464834  |
| F | -3.742839 | -1.008642 | 1.061190  |
| H | 3.078124  | -0.130347 | 0.625472  |
| F | 3.756948  | 0.176416  | 1.240106  |

=====  
[2HF...S,O<sub>a</sub>,O<sub>b</sub>...HF]-PC  
=====

|   |          |          |           |
|---|----------|----------|-----------|
| O | 0.288016 | 0.029770 | -0.826081 |
|---|----------|----------|-----------|

|   |           |           |           |
|---|-----------|-----------|-----------|
| O | -2.352719 | 0.417709  | -0.525984 |
| H | -2.045655 | 1.234239  | -0.099465 |
| H | -1.488245 | -0.014344 | -0.736653 |
| H | 0.138675  | 1.227887  | -0.200121 |
| S | 1.347723  | -1.031252 | -0.236158 |
| H | 0.908824  | -1.234915 | 1.040595  |
| F | -0.184633 | 2.105496  | 0.251604  |
| H | -3.404375 | -0.376252 | 0.243983  |
| F | -4.106796 | -0.863531 | 0.714297  |
| H | 3.147383  | -0.147858 | 0.323763  |
| F | 4.035589  | 0.117083  | 0.592204  |

=====  
 =====  
 =====

[Gua<sup>+</sup>•••S,O<sub>a</sub>,O<sub>b</sub>]-RC

|   |           |           |           |
|---|-----------|-----------|-----------|
| C | 1.862532  | -0.005458 | 0.011890  |
| N | 3.223479  | 0.082660  | -0.056821 |
| N | 1.257844  | -1.150325 | -0.233416 |
| N | 1.178403  | 1.080123  | 0.363792  |
| O | -1.582112 | 1.271612  | 0.565190  |
| O | -1.840175 | 1.989203  | -0.668106 |
| H | -2.769326 | 2.234143  | -0.554239 |
| H | -1.794239 | 0.291189  | 0.325954  |
| H | 0.185366  | -1.309285 | -0.126566 |
| H | 1.803563  | -1.943821 | -0.531307 |
| H | 1.671952  | 1.920569  | 0.612761  |
| H | 0.141987  | 1.100256  | 0.437663  |
| H | 3.737454  | -0.679792 | -0.466553 |
| H | 3.650109  | 0.990763  | -0.147122 |
| S | -1.765273 | -1.669773 | -0.036004 |
| H | -1.797470 | -2.028641 | 1.262566  |

=====  
 =====  
 =====

[Gua<sup>+</sup>•••S,O<sub>a</sub>,O<sub>b</sub>]-TS

|   |           |           |           |
|---|-----------|-----------|-----------|
| O | -1.267625 | 1.035044  | -0.124388 |
| O | -0.692839 | 2.580359  | 0.016434  |
| H | -0.956594 | 2.891103  | -0.859683 |
| H | -2.072842 | 1.079302  | 0.417402  |
| S | -2.378290 | -1.247453 | 0.020418  |
| H | -2.229143 | -1.429276 | 1.349571  |
| C | 1.763604  | -0.343583 | -0.013314 |
| N | 3.022262  | -0.860948 | 0.094860  |
| H | 3.813893  | -0.254889 | -0.047388 |
| H | 3.171140  | -1.831939 | -0.124685 |
| N | 1.611529  | 0.965191  | 0.167878  |
| H | 2.388245  | 1.505653  | 0.509926  |
| H | 0.703489  | 1.449378  | 0.093631  |
| N | 0.750025  | -1.145088 | -0.274991 |
| H | 0.924848  | -2.122004 | -0.450596 |
| H | -0.275027 | -0.903887 | -0.185580 |

=====  
 [Gua<sup>+</sup>•••S,O<sub>a</sub>,O<sub>b</sub>]-PC  
 =====

|   |           |           |           |
|---|-----------|-----------|-----------|
| C | 2.168086  | -0.226579 | -0.035794 |
| N | 3.461676  | -0.734584 | -0.020844 |
| N | 1.205154  | -1.167775 | 0.192220  |
| N | 1.865448  | 1.015954  | -0.231364 |
| O | -1.629356 | -0.184096 | 0.538800  |
| O | -0.579961 | 2.180733  | 0.019492  |
| H | -0.555574 | 2.802444  | 0.753497  |
| H | -1.404314 | 0.765840  | 0.331365  |
| H | 0.242023  | -0.855266 | 0.290582  |
| H | 1.457437  | -1.970255 | 0.746796  |
| H | 2.667754  | 1.569790  | -0.515042 |
| H | 0.350046  | 1.810390  | -0.076035 |
| H | 3.575418  | -1.678499 | -0.362349 |
| H | 4.183853  | -0.105829 | -0.336944 |
| S | -2.978623 | -0.646978 | -0.329759 |
| H | -3.918599 | -0.395756 | 0.612616  |

=====  
 [FH•••S,O<sub>a</sub>,O<sub>b</sub>•••Gua<sup>+</sup>]-RC  
 =====

|   |           |           |           |
|---|-----------|-----------|-----------|
| O | -2.146980 | 0.428390  | 0.777043  |
| O | -2.671628 | -0.464586 | -0.238489 |
| H | -3.595750 | -0.183545 | -0.281129 |
| H | -1.549437 | 1.061506  | 0.243943  |
| S | -0.009743 | 2.270505  | -0.497837 |
| H | 0.052107  | 1.738820  | -1.734090 |
| H | 1.512002  | 1.549009  | 0.106062  |
| F | 2.348020  | 1.034100  | 0.515613  |
| C | 0.645412  | -1.522022 | 0.035289  |
| N | 1.889802  | -1.494933 | -0.460235 |
| H | 2.081332  | -1.927035 | -1.348921 |
| H | 2.446726  | -0.677377 | -0.197970 |
| N | -0.316882 | -2.255180 | -0.555539 |
| H | -0.166375 | -2.569908 | -1.500571 |
| H | -1.280193 | -2.034470 | -0.322426 |
| N | 0.384456  | -0.876836 | 1.168002  |
| H | 1.081332  | -0.186862 | 1.439538  |
| H | -0.583278 | -0.594772 | 1.334679  |

=====  
 [FH•••S,O<sub>a</sub>,O<sub>b</sub>•••Gua<sup>+</sup>]-TS  
 =====

|   |           |           |           |
|---|-----------|-----------|-----------|
| O | -0.800423 | 1.622015  | -0.135259 |
| O | 0.416493  | 2.756576  | -0.057307 |
| H | 0.226190  | 3.187511  | -0.901365 |
| H | -1.399110 | 1.979748  | 0.539076  |
| S | -2.763333 | -0.003848 | 0.074956  |
| H | -2.777114 | -0.160080 | 1.415349  |

|   |           |           |           |
|---|-----------|-----------|-----------|
| H | -1.888786 | -1.720253 | -0.186045 |
| F | -1.319801 | -2.537279 | -0.274381 |
| C | 1.960536  | -0.467653 | 0.060831  |
| N | 2.846862  | -1.494553 | 0.128473  |
| H | 3.788368  | -1.356840 | -0.199781 |
| H | 2.494787  | -2.437902 | 0.092627  |
| N | 2.422001  | 0.787698  | 0.006131  |
| H | 3.382725  | 0.977829  | 0.236234  |
| H | 1.753625  | 1.577912  | -0.033426 |
| N | 0.669503  | -0.699486 | 0.070879  |
| H | 0.244803  | -1.620035 | -0.041348 |
| H | 0.005716  | 0.090766  | 0.085972  |

=====  
 [FH•••S,O<sub>a</sub>,O<sub>b</sub>•••Gua<sup>+</sup>]-PC  
 =====

|   |           |           |           |
|---|-----------|-----------|-----------|
| O | -1.482773 | 0.674966  | -0.719746 |
| O | -0.018958 | 2.706473  | -0.049017 |
| H | 0.150697  | 3.393722  | -0.700859 |
| H | -1.090807 | 1.570038  | -0.478567 |
| S | -2.530325 | 0.156500  | 0.457283  |
| H | -1.671444 | 0.042383  | 1.502375  |
| H | -1.925314 | -1.904054 | 0.028528  |
| F | -1.415262 | -2.687014 | -0.128380 |
| C | 2.134752  | -0.223129 | -0.004809 |
| N | 3.156258  | -1.057881 | 0.417477  |
| H | 4.005683  | -0.609661 | 0.722760  |
| H | 3.307532  | -1.900742 | -0.117242 |
| N | 2.108987  | 1.060522  | 0.181810  |
| H | 2.973418  | 1.410549  | 0.582909  |
| H | 0.821360  | 2.146322  | 0.021885  |
| N | 1.114076  | -0.864716 | -0.643137 |
| H | 0.923481  | -1.827725 | -0.407149 |
| H | 0.278037  | -0.319926 | -0.829825 |

=====  
 [HOH•••S,O<sub>a</sub>,O<sub>b</sub>•••Gua<sup>+</sup>]-RC  
 =====

|   |           |           |           |
|---|-----------|-----------|-----------|
| O | -2.121273 | 0.396551  | 0.842016  |
| O | -2.725327 | -0.501975 | -0.123433 |
| H | -3.646045 | -0.208620 | -0.113107 |
| H | -1.562965 | 1.042120  | 0.256865  |
| S | -0.140984 | 2.228500  | -0.554625 |
| H | -0.133334 | 1.695077  | -1.792230 |
| H | 1.718763  | 1.494775  | 0.127144  |
| C | 0.652021  | -1.494433 | 0.004149  |
| N | 1.900117  | -1.526594 | -0.488976 |
| H | 2.053006  | -1.920407 | -1.402979 |
| H | 2.503174  | -0.747044 | -0.211004 |
| N | -0.346696 | -2.146187 | -0.617101 |
| H | -0.211613 | -2.426033 | -1.575206 |

|   |           |           |           |
|---|-----------|-----------|-----------|
| H | -1.300941 | -1.897382 | -0.368483 |
| N | 0.421199  | -0.880303 | 1.160247  |
| H | 1.151082  | -0.243906 | 1.470487  |
| H | -0.535822 | -0.552991 | 1.324483  |
| O | 2.512044  | 1.012751  | 0.532089  |
| H | 3.162421  | 1.687986  | 0.748575  |

=====  
[HOH•••S<sub>a</sub>O<sub>a</sub>•••O<sub>b</sub>•••Gua<sup>+</sup>]-TS  
=====

|   |           |           |           |
|---|-----------|-----------|-----------|
| O | -0.701629 | 1.709733  | -0.186425 |
| O | 0.510364  | 2.829124  | -0.106573 |
| H | 0.342539  | 3.249928  | -0.960261 |
| H | -1.332158 | 2.057361  | 0.466525  |
| S | -2.724739 | 0.139799  | 0.153379  |
| H | -2.623863 | -0.013765 | 1.490599  |
| H | -1.889733 | -1.917477 | -0.106624 |
| C | 1.895521  | -0.508870 | 0.049487  |
| N | 2.760400  | -1.545783 | 0.210367  |
| H | 3.732893  | -1.418898 | -0.015584 |
| H | 2.402781  | -2.485245 | 0.145864  |
| N | 2.378358  | 0.740439  | 0.058717  |
| H | 3.304390  | 0.907972  | 0.415068  |
| H | 1.736677  | 1.549148  | -0.028103 |
| N | 0.612781  | -0.732404 | -0.099590 |
| H | 0.195283  | -1.660910 | -0.207441 |
| H | -0.053393 | 0.054889  | -0.077871 |
| O | -1.323951 | -2.728728 | -0.221958 |
| H | -1.731758 | -3.223352 | -0.939976 |

=====  
[HOH•••S<sub>a</sub>O<sub>a</sub>•••O<sub>b</sub>•••Gua<sup>+</sup>]-PC  
=====

|   |           |           |           |
|---|-----------|-----------|-----------|
| O | -1.582448 | -0.685340 | 0.724544  |
| O | -0.106127 | -2.759647 | 0.106040  |
| H | 0.047153  | -3.425453 | 0.783528  |
| H | -1.194287 | -1.579123 | 0.491445  |
| S | -2.518960 | -0.124460 | -0.531103 |
| H | -1.551738 | 0.093893  | -1.457703 |
| H | -1.663491 | 2.200777  | -0.006279 |
| C | 2.077103  | 0.129360  | 0.002488  |
| N | 3.068403  | 0.969085  | -0.478369 |
| H | 3.915129  | 0.528047  | -0.800688 |
| H | 3.218863  | 1.832077  | 0.023029  |
| N | 2.059844  | -1.157737 | -0.162488 |
| H | 2.907199  | -1.504115 | -0.601413 |
| H | 0.745058  | -2.221527 | 0.022441  |
| N | 1.077410  | 0.767762  | 0.675707  |
| H | 0.844392  | 1.721791  | 0.428852  |
| H | 0.257576  | 0.210514  | 0.893359  |
| O | -1.022626 | 2.918788  | 0.131483  |
| H | -1.435101 | 3.514146  | 0.765670  |

=====  
=====  
[H<sub>2</sub>C=NH•••S,O<sub>a</sub>,O<sub>b</sub>•••Gua<sup>+</sup>]-RC  
=====

|   |           |           |           |
|---|-----------|-----------|-----------|
| O | -2.554959 | -0.954167 | -0.579915 |
| O | -3.307487 | -1.068813 | 0.653215  |
| H | -3.879427 | -1.823829 | 0.455415  |
| H | -1.698614 | -1.482558 | -0.386354 |
| S | 0.190360  | -2.183429 | -0.103316 |
| H | 0.022658  | -2.316957 | 1.227153  |
| H | 2.518529  | -0.971856 | 0.005248  |
| C | -0.347398 | 1.918472  | -0.029604 |
| N | 0.046251  | 3.206368  | 0.186869  |
| H | -0.524470 | 3.955350  | -0.170785 |
| H | 1.032772  | 3.398265  | 0.253170  |
| N | -1.645850 | 1.680049  | -0.235920 |
| H | -2.322065 | 2.388269  | -0.004219 |
| H | -1.990797 | 0.714494  | -0.379015 |
| N | 0.531643  | 0.945274  | -0.018553 |
| H | 1.537592  | 1.100026  | 0.030376  |
| H | 0.268612  | -0.081681 | -0.041787 |
| N | 3.179264  | -0.178754 | 0.044980  |
| C | 4.385958  | -0.565852 | 0.050859  |
| H | 5.191509  | 0.172155  | 0.090894  |
| H | 4.686998  | -1.619266 | 0.017397  |

=====  
=====  
[H<sub>2</sub>C=NH•••S,O<sub>a</sub>,O<sub>b</sub>•••Gua<sup>+</sup>]-TS  
=====

|   |           |           |           |
|---|-----------|-----------|-----------|
| O | -1.197233 | -1.737713 | -0.228179 |
| O | -2.838246 | -1.617367 | -0.198534 |
| H | -3.004576 | -1.982979 | -1.077583 |
| H | -1.027823 | -2.497450 | 0.357042  |
| S | 1.296628  | -2.266763 | 0.205208  |
| H | 1.284368  | -2.033353 | 1.534950  |
| H | 2.490585  | -0.130855 | -0.091954 |
| C | -1.201469 | 1.634955  | 0.082512  |
| N | -1.043817 | 2.978590  | 0.248476  |
| H | -1.782158 | 3.595659  | -0.047902 |
| H | -0.109962 | 3.354122  | 0.200835  |
| N | -2.442293 | 1.140344  | 0.016139  |
| H | -3.217169 | 1.721099  | 0.289645  |
| H | -2.613394 | 0.122573  | -0.083347 |
| N | -0.148747 | 0.856891  | 0.010394  |
| H | 0.812631  | 1.211657  | -0.038145 |
| H | -0.256286 | -0.168130 | -0.002878 |
| N | 2.704529  | 0.883086  | -0.150977 |
| C | 3.945219  | 1.107426  | -0.270521 |
| H | 4.310577  | 2.135626  | -0.342921 |
| H | 4.700780  | 0.314223  | -0.307531 |

=====  
=====  
[H<sub>2</sub>C=NH•••S,O<sub>a</sub>,O<sub>b</sub>•••Gua<sup>+</sup>]-PC  
=====



```

=====
O    0.268338 -1.789549 -0.705793
O   -2.279019 -2.095730 -0.129483
H   -2.850528 -2.420740 -0.832006
H   -0.659127 -2.093173 -0.484313
S    1.324568 -2.268825  0.488886
H    0.972585 -1.394006  1.464529
H    2.545881  0.322200 -0.108363
C   -1.667512  1.461190  0.014348
N   -1.747319  2.770099  0.467574
H   -2.663833  3.094532  0.733153
H   -1.202004  3.455652 -0.034327
N   -2.603130  0.574464  0.166613
H   -3.445979  0.964758  0.576053
H   -2.470258 -1.108438 -0.029526
N   -0.497619  1.154127 -0.610562
H    0.350213  1.657167 -0.369883
H   -0.333602  0.171827 -0.805763
N    2.542273  1.347562 -0.125778
C    3.718163  1.821177 -0.082260
H    3.858050  2.904582 -0.092886
H    4.627636  1.211112 -0.034099
=====

```

```

=====
[H2NH...S,Oa,Ob...Gua+]-RC
=====

```

```

O   -2.419477  0.117683 -0.580173
O   -3.137710  0.363706  0.654299
H   -3.992745 -0.045210  0.459521
H   -1.905363 -0.749017 -0.388354
S   -0.564665 -2.250062 -0.106142
H   -0.791743 -2.295983  1.221487
H    2.215808 -2.237812  0.040893
C    0.866465  1.628533 -0.030536
N    1.820932  2.580189  0.186592
H    1.674106  3.505643 -0.183346
H    2.780733  2.281420  0.250793
N   -0.389682  2.032273 -0.246634
H   -0.652393  2.976248 -0.017648
H   -1.148299  1.341650 -0.384842
N    1.180852  0.356709 -0.010543
H    2.139966  0.005539  0.045683
H    0.465294 -0.426016 -0.036727
N    3.136229 -1.786267  0.082565
H    3.602663 -2.137621  0.914575
H    3.666987 -2.120481 -0.717404
=====

```

```

[H2NH...S,Oa,Ob...Gua+]-TS
=====

```

```

O    0.608699 -1.793030 -0.199401
=====

```

|   |           |           |           |
|---|-----------|-----------|-----------|
| O | -0.592283 | -2.909655 | -0.101572 |
| H | -0.455026 | -3.316315 | -0.967515 |
| H | 1.297400  | -2.162722 | 0.381672  |
| S | 2.691368  | -0.288167 | 0.141084  |
| H | 2.544473  | -0.114090 | 1.471986  |
| H | 1.936086  | 2.137371  | -0.206949 |
| C | -1.825558 | 0.538324  | 0.065808  |
| N | -2.693482 | 1.581772  | 0.206005  |
| H | -3.649170 | 1.459428  | -0.086895 |
| H | -2.322951 | 2.514448  | 0.114134  |
| N | -2.322530 | -0.704319 | 0.043192  |
| H | -3.273708 | -0.857140 | 0.333834  |
| H | -1.702911 | -1.531162 | -0.027232 |
| N | -0.538959 | 0.765548  | -0.023764 |
| H | -0.125227 | 1.707027  | -0.103933 |
| H | 0.132082  | -0.016834 | -0.020553 |
| N | 1.310353  | 2.953333  | -0.282991 |
| H | 1.582793  | 3.608625  | 0.444799  |
| H | 1.508620  | 3.399233  | -1.174848 |

=====  
[H<sub>2</sub>NH...S,O<sub>a</sub>,O<sub>b</sub>...Gua<sup>+</sup>]-PC  
=====

|   |           |           |           |
|---|-----------|-----------|-----------|
| O | 1.868659  | 0.412007  | -0.525890 |
| O | 1.766011  | -2.192349 | -0.176863 |
| H | 1.955242  | -2.731274 | -0.951145 |
| H | 2.003920  | -0.571648 | -0.405714 |
| S | 3.055522  | 1.252300  | 0.286309  |
| H | 2.524747  | 1.234530  | 1.534022  |
| H | -2.144849 | 3.456620  | -0.229325 |
| C | -1.656681 | -1.027665 | 0.067900  |
| N | -3.014806 | -1.013361 | 0.370487  |
| H | -3.477043 | -1.908935 | 0.348611  |
| H | -3.558305 | -0.267385 | -0.039181 |
| N | -0.903015 | -2.079248 | 0.182648  |
| H | -1.421804 | -2.892638 | 0.497431  |
| H | 0.762678  | -2.211127 | -0.047158 |
| N | -1.160389 | 0.165241  | -0.338705 |
| H | -1.732648 | 1.000861  | -0.270531 |
| H | -0.154965 | 0.282517  | -0.407053 |
| N | -2.902188 | 2.785967  | -0.123703 |
| H | -3.316806 | 2.949184  | 0.789914  |
| H | -3.603008 | 3.021027  | -0.821271 |

=====  
=====  
=====  
[Gua<sup>+</sup>...S,O<sub>a</sub>]-RC  
=====

|   |          |           |           |
|---|----------|-----------|-----------|
| C | 1.862532 | -0.005458 | 0.011890  |
| N | 3.223479 | 0.082660  | -0.056821 |
| N | 1.257844 | -1.150325 | -0.233416 |
| N | 1.178403 | 1.080123  | 0.363792  |

|   |           |           |           |
|---|-----------|-----------|-----------|
| O | -1.582112 | 1.271612  | 0.565190  |
| O | -1.840175 | 1.989203  | -0.668106 |
| H | -2.769326 | 2.234143  | -0.554239 |
| H | -1.794239 | 0.291189  | 0.325954  |
| H | 0.185366  | -1.309285 | -0.126566 |
| H | 1.803563  | -1.943821 | -0.531307 |
| H | 1.671952  | 1.920569  | 0.612761  |
| H | 0.141987  | 1.100256  | 0.437663  |
| H | 3.737454  | -0.679792 | -0.466553 |
| H | 3.650109  | 0.990763  | -0.147122 |
| S | -1.765273 | -1.669773 | -0.036004 |
| H | -1.797470 | -2.028641 | 1.262566  |

=====  
[Gua<sup>+</sup>•••S,O<sub>a</sub>]-TS  
=====

|   |           |           |           |
|---|-----------|-----------|-----------|
| C | 1.818487  | -0.065567 | -0.006336 |
| N | 3.164441  | 0.132202  | 0.070220  |
| N | 1.331507  | -1.299297 | 0.064997  |
| N | 1.006286  | 0.967153  | -0.126454 |
| O | -1.637909 | 0.741476  | 0.050353  |
| O | -1.472483 | 2.529363  | -0.000374 |
| H | -1.998691 | 2.681889  | 0.794488  |
| H | -2.179513 | 0.736529  | -0.749668 |
| H | 0.290790  | -1.471704 | 0.058115  |
| H | 1.949197  | -2.087123 | 0.167188  |
| H | 1.356340  | 1.910781  | -0.112723 |
| H | -0.038214 | 0.859055  | -0.111280 |
| H | 3.784625  | -0.651950 | -0.045239 |
| H | 3.540071  | 1.029910  | -0.188391 |
| S | -1.819909 | -1.612589 | -0.090809 |
| H | -2.129490 | -1.579679 | 1.217292  |

=====  
[Gua<sup>+</sup>•••S,O<sub>a</sub>]-PC  
=====

|   |           |           |           |
|---|-----------|-----------|-----------|
| C | 2.168086  | -0.226579 | -0.035794 |
| N | 3.461676  | -0.734584 | -0.020844 |
| N | 1.205154  | -1.167775 | 0.192220  |
| N | 1.865448  | 1.015954  | -0.231364 |
| O | -1.629356 | -0.184096 | 0.538800  |
| O | -0.579961 | 2.180733  | 0.019492  |
| H | -0.555574 | 2.802444  | 0.753497  |
| H | -1.404314 | 0.765840  | 0.331365  |
| H | 0.242023  | -0.855266 | 0.290582  |
| H | 1.457437  | -1.970255 | 0.746796  |
| H | 2.667754  | 1.569790  | -0.515042 |
| H | 0.350046  | 1.810390  | -0.076035 |
| H | 3.575418  | -1.678499 | -0.362349 |
| H | 4.183853  | -0.105829 | -0.336944 |
| S | -2.978623 | -0.646978 | -0.329759 |
| H | -3.918599 | -0.395756 | 0.612616  |

=====  
 =====  
 [Gua<sup>+</sup>•••S,O<sub>a</sub>,O<sub>b</sub>•••HF]–RC  
 =====

|   |           |           |           |
|---|-----------|-----------|-----------|
| C | -1.976990 | -0.225747 | 0.072552  |
| N | -2.875305 | -1.228992 | -0.081082 |
| N | -2.287812 | 1.018455  | -0.282649 |
| N | -0.795828 | -0.462674 | 0.620556  |
| O | 2.572081  | 0.009167  | 0.474198  |
| O | 2.383960  | -0.822519 | -0.699235 |
| H | 3.288803  | -0.907606 | -1.029698 |
| H | 2.023187  | 0.828304  | 0.232948  |
| H | -1.517608 | 1.723331  | -0.249163 |
| H | -3.211405 | 1.264077  | -0.595360 |
| H | -0.395956 | -1.396444 | 0.627562  |
| H | -0.143878 | 0.347227  | 0.627053  |
| H | -3.647316 | -1.115356 | -0.716700 |
| H | -2.589004 | -2.173719 | 0.120623  |
| S | 0.611701  | 2.348530  | -0.073041 |
| H | 0.645619  | 2.880691  | 1.163811  |
| F | 0.903643  | -2.710419 | 0.085303  |
| H | 1.553779  | -2.059434 | -0.212945 |

=====  
 =====  
 [Gua<sup>+</sup>••• S,O<sub>a</sub>,O<sub>b</sub>•••HF]–TS  
 =====

|   |           |           |           |
|---|-----------|-----------|-----------|
| C | -1.951897 | -0.493969 | 0.014688  |
| N | -2.843028 | -1.516906 | 0.080089  |
| N | -2.386028 | 0.764891  | -0.043776 |
| N | -0.658464 | -0.737018 | 0.028091  |
| O | 1.886465  | 0.494605  | 0.109791  |
| O | 2.980255  | -0.720291 | -0.061060 |
| H | 3.433167  | -0.611700 | 0.786417  |
| H | 2.204903  | 1.107031  | -0.574185 |
| H | -1.663456 | 1.520595  | -0.033164 |
| H | -3.353659 | 0.984941  | 0.121817  |
| H | -0.242867 | -1.663474 | -0.015035 |
| H | 0.006211  | 0.046827  | 0.037821  |
| H | -3.794759 | -1.361449 | -0.207955 |
| H | -2.502361 | -2.462205 | 0.007244  |
| S | 0.302470  | 2.526426  | -0.097048 |
| H | 0.504585  | 2.742773  | 1.215833  |
| F | 1.389258  | -2.626258 | -0.072246 |
| H | 2.055668  | -1.897295 | -0.064626 |

=====  
 =====  
 [Gua<sup>+</sup>••• S,O<sub>a</sub>,O<sub>b</sub>•••HF]–PC  
 =====

|   |           |           |           |
|---|-----------|-----------|-----------|
| C | 1.938557  | -0.853371 | 0.062840  |
| N | 2.782221  | 0.052949  | -0.403623 |
| N | 1.994897  | -2.148333 | -0.334717 |
| N | 1.051644  | -0.477347 | 0.988999  |
| O | -1.659928 | -0.396267 | 0.062338  |

|   |           |           |           |
|---|-----------|-----------|-----------|
| O | -0.670676 | 1.935453  | -0.686378 |
| H | -1.177014 | 2.746700  | -0.589929 |
| H | -1.373994 | 0.516379  | -0.241771 |
| H | 1.293743  | -2.788470 | 0.001674  |
| H | 2.425320  | -2.376071 | -1.215579 |
| H | 1.061392  | 0.545836  | 1.141386  |
| H | 0.137533  | -0.917766 | 0.994675  |
| H | 3.551446  | -0.203528 | -0.998442 |
| H | 2.510901  | 1.057404  | -0.158501 |
| S | -3.314911 | -0.528953 | -0.072771 |
| H | -3.667336 | -0.084141 | 1.158421  |
| F | 1.584519  | 2.076891  | 0.464876  |
| H | 0.228073  | 2.090741  | -0.250807 |

=====  
 =====  
 =====

[Gua<sup>+</sup>•••S,O<sub>a</sub>,O<sub>b</sub>•••HOH]-RC

|   |           |           |           |
|---|-----------|-----------|-----------|
| C | 2.012168  | 0.303838  | 0.027699  |
| N | 2.933915  | 1.300951  | 0.073998  |
| N | 2.398745  | -0.945672 | -0.239924 |
| N | 0.740977  | 0.550067  | 0.265048  |
| O | -2.564949 | -0.179218 | 0.624551  |
| O | -2.679193 | 0.615885  | -0.582188 |
| H | -3.589737 | 0.433624  | -0.851119 |
| H | -1.985931 | -0.944364 | 0.317805  |
| H | 1.645807  | -1.670847 | -0.239653 |
| H | 3.366439  | -1.211875 | -0.166761 |
| H | 0.334485  | 1.485328  | 0.247210  |
| H | 0.113159  | -0.280480 | 0.264193  |
| H | 3.813682  | 1.183834  | -0.400829 |
| H | 2.618593  | 2.246181  | 0.220598  |
| S | -0.462622 | -2.397520 | -0.105567 |
| H | -0.411827 | -2.806985 | 1.177413  |
| H | -1.749773 | 2.181748  | -0.103476 |
| O | -1.032770 | 2.822392  | 0.076643  |
| H | -1.126116 | 3.511236  | -0.588404 |

=====  
 =====  
 =====

[Gua<sup>+</sup>•••S,O<sub>a</sub>,O<sub>b</sub>•••HOH]-TS

|   |           |           |           |
|---|-----------|-----------|-----------|
| C | -1.897842 | -0.339275 | 0.013538  |
| N | -2.908418 | -1.240753 | 0.145586  |
| N | -2.172409 | 0.964021  | 0.021739  |
| N | -0.656701 | -0.759015 | -0.109036 |
| O | 1.805556  | 0.478665  | 0.123450  |
| O | 2.769163  | -0.920450 | 0.098208  |
| H | 3.174379  | -0.784217 | 0.964404  |
| H | 2.257813  | 0.953676  | -0.589579 |
| H | -1.370190 | 1.641573  | -0.007075 |
| H | -3.088668 | 1.289452  | 0.281323  |
| H | -0.391860 | -1.743493 | -0.158727 |

|   |           |           |           |
|---|-----------|-----------|-----------|
| H | 0.135771  | -0.098714 | -0.093400 |
| H | -3.852500 | -0.957141 | -0.056504 |
| H | -2.701112 | -2.220035 | 0.033817  |
| S | 0.547976  | 2.621369  | -0.151386 |
| H | 0.782847  | 2.824366  | 1.157704  |
| H | 1.715333  | -2.309170 | 0.012081  |
| O | 1.022863  | -3.013658 | -0.077606 |
| H | 1.339655  | -3.608773 | -0.763528 |

=====  
[Gua<sup>+</sup>•••S<sub>1</sub>O<sub>a</sub>,O<sub>b</sub>•••HOH]-PC  
=====

|   |           |           |           |
|---|-----------|-----------|-----------|
| C | 2.026435  | 0.086011  | 0.012045  |
| N | 3.118815  | 0.919359  | 0.179229  |
| N | 2.353785  | -1.238336 | -0.173514 |
| N | 0.798505  | 0.467215  | 0.028397  |
| O | -1.436071 | -0.817510 | -0.019310 |
| O | -2.892965 | 1.557072  | -0.023523 |
| H | -3.438677 | 1.606344  | 0.767693  |
| H | -2.566690 | 0.635344  | -0.062674 |
| H | 1.562063  | -1.871853 | -0.172685 |
| H | 3.170948  | -1.579786 | 0.310013  |
| H | 0.650098  | 1.476163  | 0.030323  |
| H | -0.506076 | -0.342042 | 0.004192  |
| H | 3.958316  | 0.674264  | -0.325495 |
| H | 2.917071  | 1.907829  | 0.185894  |
| S | -1.198120 | -2.451589 | -0.070453 |
| H | -1.222518 | -2.727162 | 1.258770  |
| H | -1.419257 | 2.671951  | -0.000384 |
| O | -0.585639 | 3.188353  | -0.010821 |
| H | -0.674310 | 3.797328  | -0.750226 |

**Figure S1. Characterization of the recombinant proteins by CD-spectroscopy. (a)** CD spectra of the dimeric forms of the Prx3 WT and R146A, R146K, R146H, R146K, R146G, R123G and R123G/R146G mutants. **(b)** CD spectra of the dimeric forms of the Prx2 WT and R127K, R150K, R127K/R150K mutants. Bar graphs represent the analysis of the SD spectra using the CDSSTR, CONTINLL and SELCON3 algorithms. 'Tight' and 'loose' helices (H(r) and H(d)) and beta sheets (S(r) and S(d)), as well as turns and unordered bits were calculated by averaging the data obtained using the different algorithms.

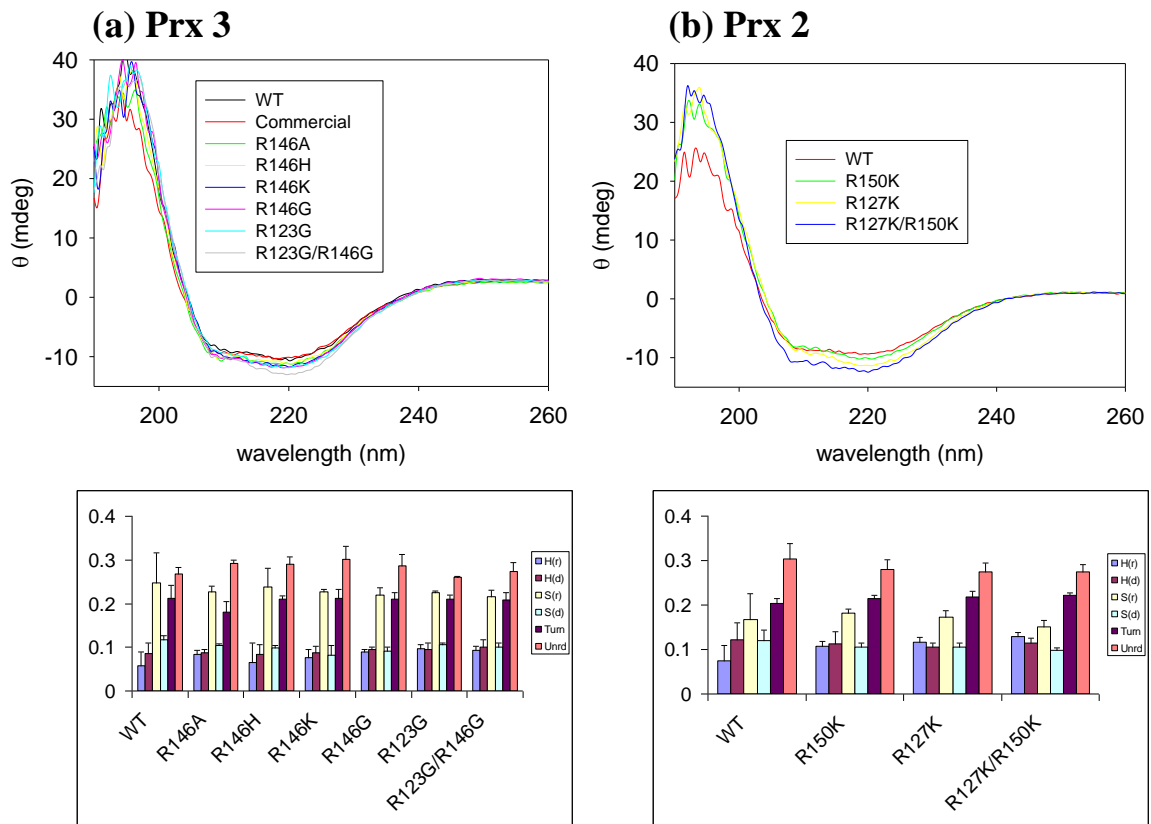

**Figure S2. Ab initio calculations for the catalytic role of H-bonding interactions (by HF) in the reaction of HS<sup>-</sup> with H<sub>2</sub>O<sub>2</sub>.** Calculated reactant complexes (RC), transition structures (TS), and product complexes (PC) located on the potential energy surface for the uncatalyzed two-electron reduction of H<sub>2</sub>O<sub>2</sub> by HS<sup>-</sup> and the reactions catalyzed by HF moieties. Hydrogen bonds are shown as dashed lines, and partial bonds in the S<sub>N</sub>2 transition structures as half dashed/half solid lines. (Atomic color scheme: H, white; O, red; F, cyan; S, yellow).

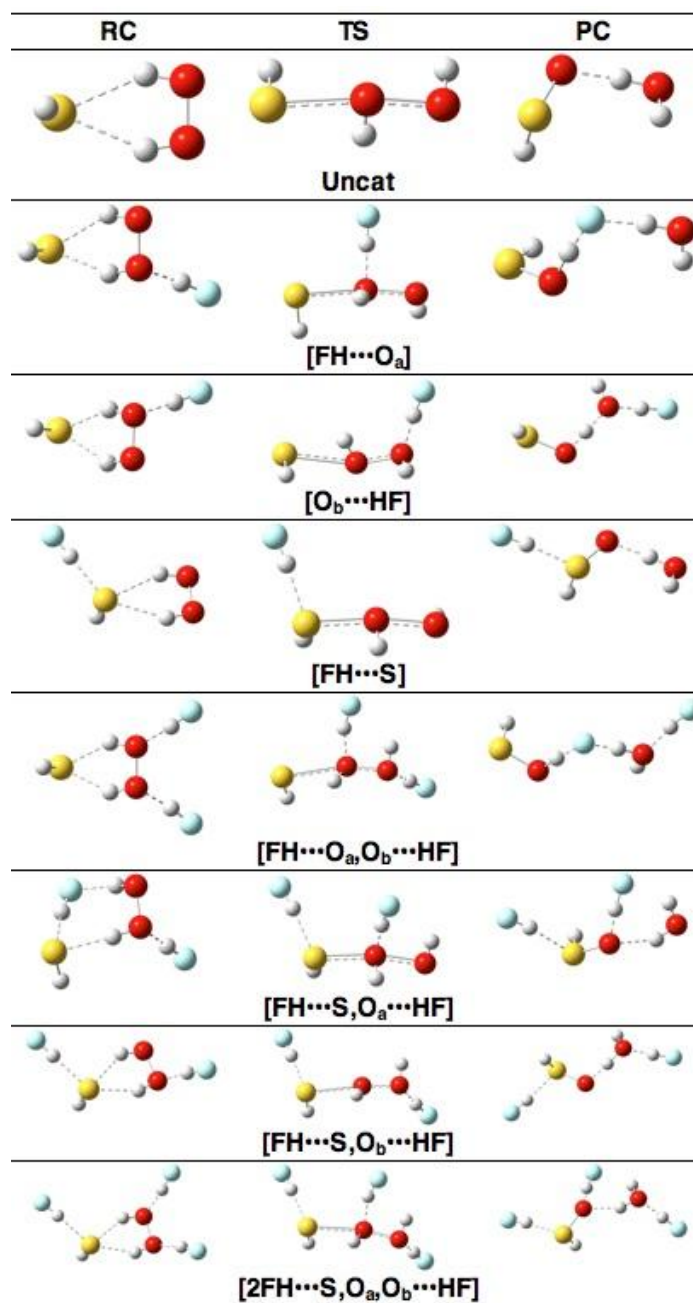



**Figure S3. Purity of (a) Prx2 and (b) Prx3 WT and mutant proteins used in experiments.** Prx proteins were purified as described and approximately 2  $\mu$ g of each protein was separated by SDS-PAGE followed by Coomassie staining.

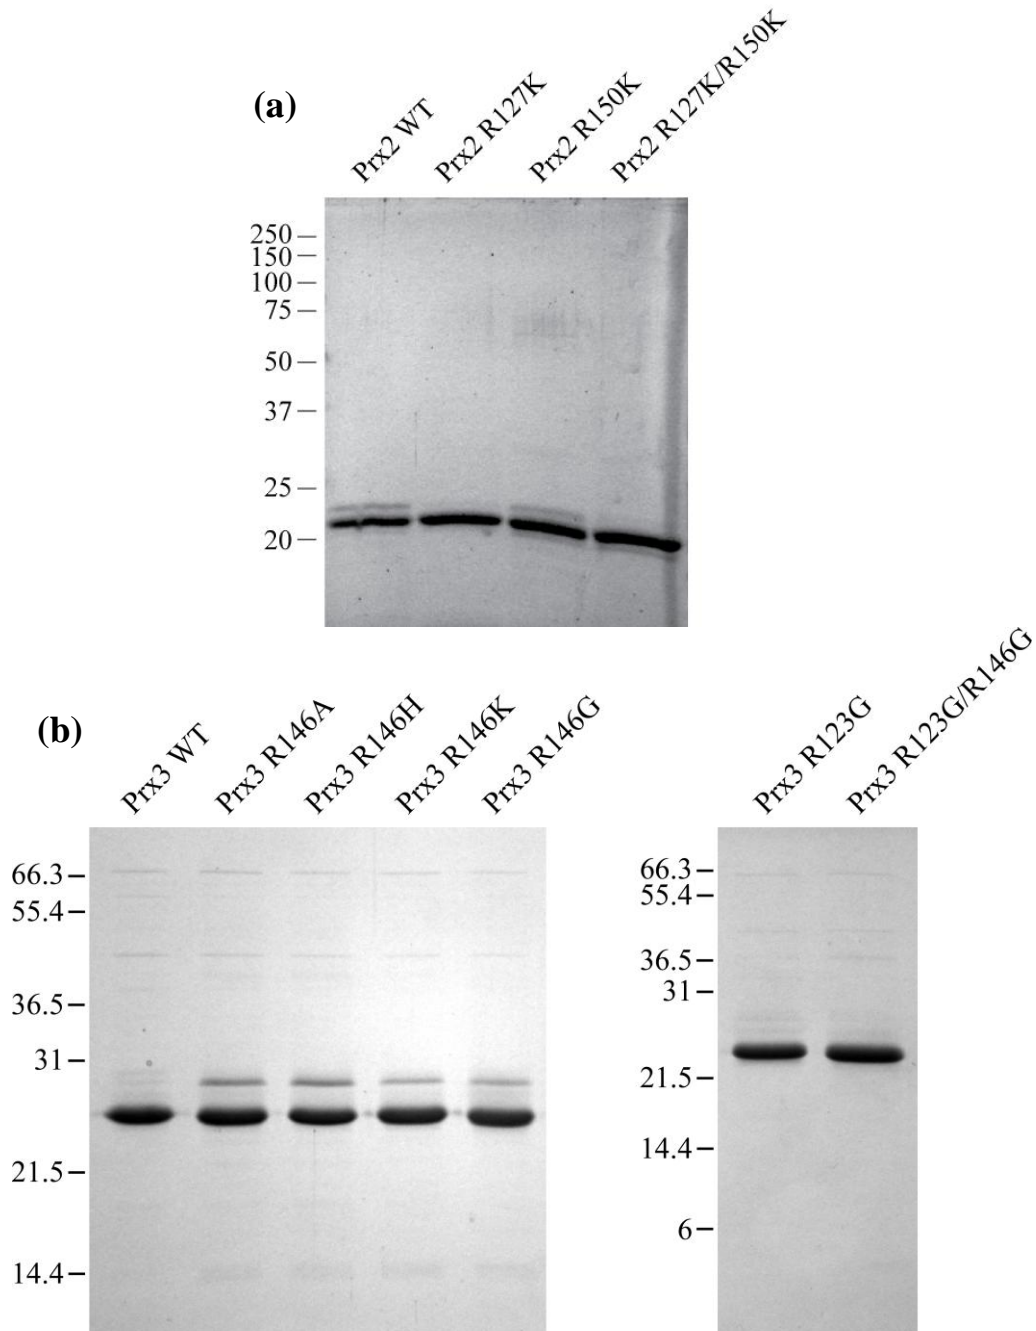

**Figure S4. Schematic energy profile for the [Gua<sup>+</sup>...S,O<sub>a</sub>,O<sub>b</sub>] reaction.** The energy profile ( $\Delta H_{298}$ , kJ mol<sup>-1</sup>, CPCM-G4//B3-LYP/6-31+G(2df,p)) is shown for the reactants, reactant complex (RC), transition structure (TS), product complex (PC) and products.

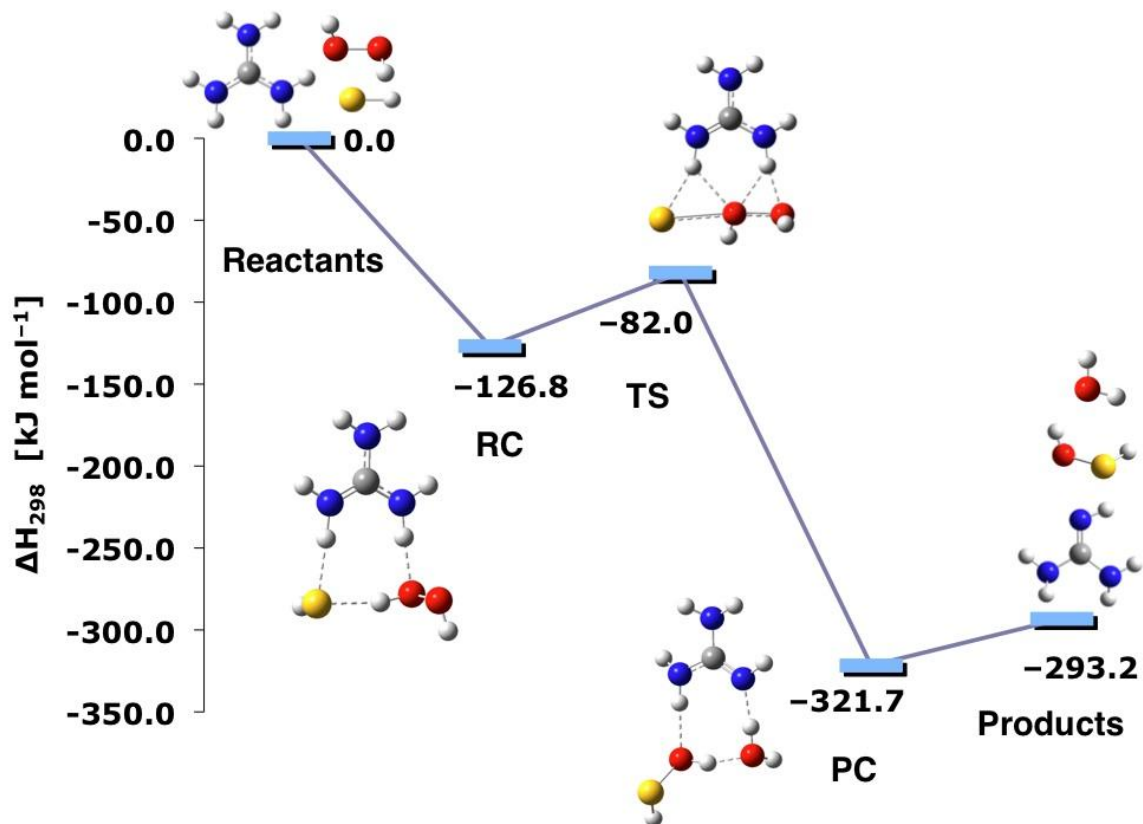

Supplement: supp_M111.232355_jbc.M111.232355-1.pdf [file supp_M111.232355_jbc.M111.232355-1.pdf]
